22 **ABSTRACT**

23 Persistence of HIV-1 latent reservoir cells during antiretroviral therapy (ART) is a major  
24 obstacle for curing HIV-1. Latency-reversing agents (LRAs) are under intensive development to  
25 reactivate and eradicate latently infected cells; however, there are a few useful models for  
26 evaluating LRA activity *in vitro*. Here, we established a chronically HIV-1-infected culture  
27 system harboring thousands of different HIV-1-infected cell clones with a wide distribution of  
28 HIV-1 provirus similar to that observed *in vivo*. A combination of an LRA and an anti-HIV-1  
29 drug successfully inhibited viral re-emergence after drug discontinuation, demonstrating  
30 “experimental cure” in the *in vitro* model. We demonstrated that the epigenetic environment of  
31 the integrated provirus plays a role in determining drug susceptibility. Our widely distributed  
32 intact provirus elimination (WIPE) assay will be useful for optimizing therapeutics against  
33 HIV-1 latency and provides mechanistic insights into the selection of heterogeneous  
34 HIV-1-infected clones during drug treatment.

## 35 INTRODUCTION

36 Advances in antiviral therapy have dramatically improved the therapeutic options available for  
37 treating human immunodeficiency virus type 1 (HIV-1) infection. However, even with the most  
38 potent combined antiretroviral therapy (cART), HIV-1-infected patients remain on medication  
39 throughout their lifetime because HIV-1 persists in viral reservoirs *in vivo* regardless of  
40 treatment<sup>1-3</sup>. In this regard, the “shock and kill” approach, which first activates cells latently  
41 infected with HIV-1<sup>2,3</sup> using small molecule agents called HIV-1 latency-reversing agents  
42 (LRAs), is a possible strategy for curing HIV-1<sup>4-9</sup>. LRAs reverse HIV-1 latency and induce viral  
43 production in cells latently infected with the virus. In theory, infected cells that express viral  
44 antigens are then killed by the human immune system, such as cytotoxic T lymphocytes, or viral  
45 cytopathic effects<sup>10-12</sup>. However, LRAs that appear potent in *in vitro* assays are not necessarily  
46 effective *in vivo* because the viral reservoir situation is quite different *in vitro* and *in vivo*<sup>13-16</sup>.  
47 The host factors shaping the HIV-1 reservoir *in vivo* include the immunological status with  
48 respect to the virus, anatomical location, and a variety of host cells. From the viral perspective,  
49 wide heterogeneity is noted *in vivo*, such as the viral sequence, presence of defective proviruses,  
50 integration sites (ISs) in the host cellular genomic DNA, and expansion of some infected  
51 clones<sup>17-21</sup>. These factors potentially affect the efficacy of LRA *in vivo*.

52 As the “shock” step may trigger the production of infectious virus and thereby induce  
53 *de novo* infection, it is essential to combine LRAs with the existing anti-HIV-1 drugs. However,  
54 no suitable *in vitro* model system to evaluate the efficacy of such combination therapies exists.  
55 Currently available *in vitro* models for HIV-1 latency, such as ACH2, J1.1, and U1 cells, carry  
56 only one or two integrated proviruses with a specific genetic and epigenetic pattern, but there  
57 are thousands of different integration sites for HIV-1 *in vivo*. Therefore, LRAs can reactivate  
58 some HIV-1 proviruses in *in vitro* models, but that may not be the case for other HIV-1  
59 proviruses integrated in a different host genome. According to a recent study, a combination of  
60 anti-HIV-1 drugs with an LRA (Toll-like receptor 7 agonist GS-9620) and a broadly

61 neutralizing anti-HIV-1 antibody (PGT121) successfully delays or inhibits viral rebound,  
62 following discontinuation of antiretroviral therapy in simian HIV-infected rhesus monkey<sup>22</sup>.  
63 Hence, *in vivo* animal models are useful for preclinical evaluation during drug development;  
64 however, the need for a specialized facility and the associated high experimental costs limit  
65 their availability for drug screening. *In vitro* systems capable of evaluating the combined effects  
66 of anti-HIV-1 drugs and LRAs are urgently required to enhance the development of LRAs.

67 In the present study, we aimed to establish a new *in vitro* infection model that  
68 harbors a much wider variety of HIV-1-infected clones than that of conventional *in vitro* models.  
69 Our *in vitro* model mimics the viral reservoir observed *in vivo* and is suitable for investigating  
70 not only possible drug combination(s) effective in eliminating HIV-1 reservoirs in the human  
71 body but also the mechanism by which HIV-1 latent cells are maintained in the reservoirs for  
72 prolonged periods of time.

73

## 74 RESULTS

75 **Development of an *in vitro* model mimicking the distribution of HIV-1 provirus *in vivo*.** To  
76 establish an HIV-1 chronically-infected *in vitro* model with a variety of HIV-1-infected clones,  
77 several host cell lines were infected with an HIV-1 infectious clone, HIV-1<sub>NL4-3</sub> or HIV-1<sub>JRFL</sub>.  
78 The cells were then cultured, and cell growth and HIV-1 level (production) in the supernatant  
79 monitored twice a week. MT-4 cells infected with HIV-1<sub>NL4-3</sub> died rapidly and no live cells were  
80 observed after 30 d (data not shown). We analyzed intracellular p24 expression in samples with  
81 adequate cell viability on day 30. Jurkat cells infected with HIV-1<sub>NL4-3</sub> (Jurkat/NL) maintained  
82 high levels of HIV-1 productivity (**Fig. 1a**) and intracellular HIV-1 DNA (**Fig. 1b**). PM1CCR5  
83 cells infected with HIV-1<sub>JRFL</sub> (PM1CCR5/JRFL) also maintained HIV-1 production and  
84 intracellular HIV-1 DNA levels after 30 d of culture; however, the p24 level in the supernatant  
85 decreased after 90 d (data not shown). Flow cytometry analyses on day 30 revealed four distinct  
86 cell populations, i.e., p24-negative live cells, p24-negative dead cells, p24-positive live cells,

87 and p24-positive dead cells (**Fig. 1c**), in the three tested infected cell lines. Based on these  
88 results, we focused on Jurkat/NL in the present study.

89 We confirmed the infectivity of viruses in the supernatant of Jurkat/NL cells using  
90 MT-4 cells (**Supplementary Fig. 1a**). We further investigated the number of HIV-1-infected  
91 clones in the *in vitro* culture model. In principle, each HIV-1-infected clone has a different viral  
92 IS, which can be used to distinguish clones. We performed ligation-mediated polymerase chain  
93 reaction (LM-PCR) to detect the junctions between the 3'-long terminal repeat (LTR) of HIV-1  
94 and the flanking host genome sequence<sup>23,24</sup>. We used 500 ng of genomic DNA and detected  
95 approximately 1,000 different ISs, demonstrating the presence of thousands of different infected  
96 clones in the *in vitro* infection model (**Fig. 1d**). This was in stark contrast with ACH-2, J1.1,  
97 and U1 cell lines, in which only two ISs were detected<sup>25</sup> (**Fig. 1d**). Next, we tested whether the  
98 distribution of HIV-1 proviruses in the *in vitro* system was equivalent to that found *in vivo*. We  
99 analyzed HIV-1 ISs in peripheral blood mononuclear cells (PBMCs) isolated from  
100 HIV-1-infected individuals following the same protocol as that for *in vitro* cultured cells. We  
101 observed similarities between HIV-1 integration *in vivo* and *in vitro*, i.e., increased integration  
102 incidence in certain chromosomes (**Fig. 1e**). Furthermore, HIV-1 preferentially integrated into  
103 the gene-containing regions both *in vitro* and *in vivo*, compared with random distribution (**Fig.**  
104 **1f**). These data indicate similarities of HIV-1 ISs between the newly developed *in vitro*  
105 infection model and *in vivo* patient material.

106

107 **The novel *in vitro* infection model can be used to screen the effectiveness of LRA and**  
108 **anti-HIV-1 drug combinations.** We next evaluated the efficacy of antiretroviral agents and/or  
109 LRAs against various HIV-1-infected clones in the *in vitro* culture system. We cultured  
110 Jurkat/NL cells in the presence or absence of an antiretroviral drug and/or a LRA (**Fig. 2a**). We  
111 used the antiretroviral drug EFdA (4'-ethynyl-2-fluoro-2'-deoxyadenosine)/MK-8591/islatravir  
112 (ISL), which is a potent nucleoside reverse-transcriptase inhibitor and currently under clinical

113 trials<sup>26,27</sup>. We evaluated 11 LRAs to determine their activity in Jurkat/NL cells, and found that  
114 PEP005 [ingenol-3-angelate, protein kinase C (PKC) activator]<sup>6</sup> induced HIV-1 production and  
115 apoptosis in HIV-1-infected cells at the lowest concentration tested (**Supplementary Fig. 1b**  
116 **and c**). Furthermore, 1  $\mu$ M SAHA and panobinostat induced strong caspase-3 activation  
117 (**Supplementary Fig. 1c**); however, the same concentration of these drugs also induced strong  
118 cell toxicity in HIV-1-negative cells (data not shown). Hence, we used PEP005 in subsequent  
119 experiments. Treatments with EFdA (50 nM), PEP005 (5 nM), or a combination of EFdA and  
120 PEP005 were started simultaneously, and supernatant p24 levels were monitored for 4 months  
121 (**Fig. 2a**). Cumulative data from multiple independent experiments are shown in **Fig. 2b**.  
122 Treatment with PEP005 alone did not suppress HIV-1 replication during the first 9 weeks of  
123 cultivation, while EFdA alone successfully decreased viral numbers in the supernatant to  
124 undetectable levels after 4–6 weeks. The combination treatment with EFdA and PEP005 also  
125 decreased the amount of HIV-1 in the supernatant to undetectable levels.

126 We next interrupted the drug treatment in week 9 and observed a remarkable rebound  
127 of viral production in samples treated with EFdA alone (11/11, 100%); however, no rebound  
128 was apparent in 64% (7/11) of samples treated with the combination of EFdA and PEP005 (**Fig.**  
129 **2b**) and the difference was statistically significant ( $p < 0.0001$ ) (**Fig. 2c**). In one representative  
130 experiment (Exp. 1), viral rebound was observed in cells treated with EFdA only, but not in  
131 cells treated with both EFdA and PEP005 (**Fig. 2d**). Viral rebound from EFdA +  
132 PEP005-treated cells was not detected (in the supernatant or intracellularly) even after  
133 stimulation with tumor necrosis factor- $\alpha$  (TNF- $\alpha$ ) in week 17, confirming lack of  
134 replication-competent HIV-1 in the treated sample (**Fig. 2e and f**). Combinations with other  
135 antiretroviral agents, i.e., Darunavir (DRV, a protease inhibitor) and Dolutegravir (DTG, an  
136 integrase inhibitor), or other LRAs (SAHA, an HDAC inhibitor; prostratin, a PKC activator)  
137 were also tested (**Supplementary Fig. 2**). In general, antiretroviral drugs (DRV, DTG, and  
138 EFdA) effectively decreased supernatant HIV-1 levels, whereas most LRAs failed to suppress

139 viral replication when used on their own. However, the combination of an LRA with an  
140 antiretroviral drug delayed or inhibited viral recurrence after treatment was discontinued.  
141 Among several drug combinations analyzed in the present study, only the EFdA + PEP005  
142 combination resulted in an experimental cure. Further drug screening may enable the  
143 identification of potent drug combinations to achieve experimental cure *in vitro*.

144

145 **Prolonged drug treatment preferentially selects defective viruses in the *in vitro* model,**  
146 **mimicking the *in vivo* scenario.** To elucidate the possible mechanism(s) underlying the  
147 experimental cure *in vitro*, we quantitatively and qualitatively analyzed HIV-1 proviruses from  
148 the model. We analyzed cell-associated HIV-1 DNA loads in one representative experiment  
149 (Exp. 6) (**Supplementary Fig. 3a**) and found that the HIV-1 DNA load was markedly  
150 decreased in samples treated with EFdA alone. The addition of PEP005 to EFdA further  
151 decreased the HIV-1 DNA load (**Fig. 3a**). After drug discontinuation, the HIV-1 DNA load  
152 increased in the sample treated with EFdA alone but not in the sample treated with both drugs  
153 (**Fig. 3a**). Accordingly, we characterized the structure of the HIV-1 proviral genome by nearly  
154 full-length PCR, using a single copy of the HIV-1 genome as a template<sup>28</sup>. We observed an  
155 increased proportion of a defective HIV-1 genome after EFdA treatment, possibly due to  
156 preferential elimination of intact, replication-competent proviruses (**Fig. 3b and c**). The  
157 tendency was more apparent upon a combined treatment with EFdA and PEP005 (**Fig. 3b and**  
158 **c**). All proviruses detected in the sample after a combined EFdA and PEP005 treatment were  
159 defective proviruses 17 weeks after initiation of drug treatment (**Fig. 3b and c**).

160 To compare the pattern of defective provirus accumulation *in vitro* and *in vivo*,  
161 peripheral blood samples of HIV-1-carrying individuals (**Supplementary Table 1**) were  
162 examined by nearly full-length, single-genome PCR. Before the initiation of cART, 25–42%  
163 proviruses in PBMCs from patients were defective, and the ratio increased to 83–100% after  
164 successful cART (treatment duration of at least 6 years) (**Fig. 3d** and **Supplementary Fig. 4**).

165 The data suggest an accumulation of defective proviruses *in vivo* caused by a preferential  
166 selection of defective and/or replication-incompetent proviruses during long-term antiretroviral  
167 treatment, in line with previous reports<sup>21,28</sup>.

168 Furthermore, we observed a significant decrease in the HIV-1 DNA level induced by  
169 the EFdA and PEP005 combination in Exp. 6 (**Fig. 3e**), similar to that in Exp. 1 (**Fig. 2d**).  
170 However, nearly full-length HIV-1 PCR and sequencing analysis revealed that all provirus  
171 amplicons were full-length upon combination treatment (**Fig. 3f**), with no critical mutations or  
172 deletions in the regions coding for viral proteins. However, these cells did not transcribe HIV-1  
173 mRNA after TNF- $\alpha$  stimulation (**Supplementary Fig. 3b**). Some regions of 5'LTR and 3'LTR  
174 are not amplified by nearly full-length HIV-1 PCR<sup>28</sup>. Therefore, we explored the possibility of  
175 deletions or mutations in the provirus outside the primer-binding sites of nearly full-length  
176 HIV-1 PCR. We first determined HIV-1 ISs by LM-PCR, as previously described<sup>24</sup>, and found  
177 that one infected clone was remarkably expanded (**Fig. 3g**). Part of the 5'LTR, including the  
178 transcription start site, in the expanded clone was deleted (**Fig. 3h** and **Supplementary Fig. 3c**).  
179 This may explain the observed lack of virus rebound. In another experiment in which no HIV-1  
180 rebound was observed (**Supplementary Fig. 5a and b**), we identified a 1-bp deletion that  
181 generated a stop codon in the HIV-1 provirus *gag* sequence (**Supplementary Fig. 5c and d**).  
182 These observations indicate that a combination of EFdA and PEP005 enhances the elimination  
183 of intact and replication-competent HIV-1 proviruses, selected only for replication-incompetent  
184 proviruses, and thus achieved an experimental cure.

185 We further observed the following underlying mechanisms for replication  
186 incompetence: (1) large deletion(s) in viral protein-coding regions; (2) critical mutation(s), such  
187 as nonsense mutations and frame-shift mutations, in the viral coding sequence; and (3)  
188 abnormalities in HIV-1 proviral transcription (a schematic diagram is shown in **Supplementary**  
189 **Fig. 6**)<sup>28-30</sup>. We termed this new *in vitro* selection and elimination assay “the widely distributed  
190 intact provirus elimination (WIPE) assay.” As shown in **Fig. 3d** and **Supplementary Fig. 4**,



191 long-term antiretroviral treatment also reduced the numbers of replication-incompetent  
192 proviruses and increased the proportion of defective HIV-1 proviruses *in vivo*. However, it is  
193 likely that a minor cell population with “replication-competent” HIV-1 proviruses persists  
194 during the long period of cART, maintaining the ability to reverse HIV-1 latency<sup>9,21</sup>. In the  
195 WIPE assay, the addition of an LRA seemed to accelerate the elimination of cells infected with  
196 replication-competent HIV-1 proviruses that exist as a minor population in Jurkat/NL cells.

197

198 **Experimental cure achieved in the new *in vitro* model is associated with reactivation of**  
199 **latent HIV-1 reservoirs.** The rationale behind using LRA as an HIV-1 cure is reactivating the  
200 latent HIV-1 provirus and inducing cell apoptosis via cytopathic effects or recognition by the  
201 host antiviral immunity<sup>4,7,11,12,31</sup>. We therefore investigated whether the experimental cure  
202 observed in the present study was indeed mediated by the reactivation of latent reservoirs.

203 First, we investigated the presence of latent clones in the Jurkat/NL system by  
204 infecting Jurkat-LTR-green fluorescent protein (GFP) cells (Jurkat cells stably transfected with  
205 a plasmid containing the GFP reporter gene driven by the HIV-1 promoter LTR) with  
206 HIV-1<sub>NL4-3</sub>. In this system, Tat expression was monitored by GFP expression. We sorted and  
207 stimulated the GFP-negative cell fraction with TNF- $\alpha$  and found that the treatment increased  
208 proviral transcription in this fraction (**Fig. 4a,b**), indicating the presence of latent reservoirs in  
209 the Jurkat/NL system. The percentage of such reservoir cells was determined to be  
210 approximately 1% (**Fig. 4c**). Since antiviral cytotoxic T-lymphocytes (CTLs) and antibodies are  
211 absent in the Jurkat/NL system, latent HIV-1-infected cells reactivated by PEP005 would have  
212 been eliminated mainly by viral cytopathicity or cell apoptosis (**Supplementary Fig. 1c**)<sup>10-12</sup>.  
213 Therefore, we examined intracellular p24 levels and cell apoptosis during the early phase of  
214 drug treatment and observed an increase in p24 protein expression in cells treated with PEP005  
215 (+/- EFdA) just 6 h after drug treatment initiation (**Fig. 4d**), which was followed by an increase  
216 in annexin V expression (**Fig. 4e**). The number of intracellular p24<sup>+</sup> cells decreased in EFdA- or

217 EFdA + PEP005-treated cell populations, and these cells constituted less than 2.5% of the total  
218 population by week 2 (**Fig. 4f**). On week 4, we analyzed caspase-3 levels in these cells and  
219 found that caspase-3 expression was much higher in p24<sup>+</sup> cells, especially in the EFdA +  
220 PEP005-treated cells, than in p24<sup>-</sup> cells (**Fig. 4g**). These observations suggest that PEP005  
221 functions as an LRA, inducing apoptosis in cells latently infected with HIV-1 and facilitating an  
222 HIV-1 cure *in vitro*.

223           Next, we analyzed the effect of PEP005 on the widely distributed HIV-1 proviruses  
224 in the host cellular genome<sup>20,21</sup>. Copy numbers of intracellular HIV-1 DNA was markedly  
225 decreased after EFdA- or EFdA + PEP005-treatment (**Fig. 3d**, week 3). The proportion of the  
226 full-length-type provirus among total proviruses in EFdA alone or EFdA + PEP005-treated cells  
227 was also decreased but was nonetheless more than 50% after the initial 3-week treatment (**Fig.**  
228 **4h**), suggesting that more than half of all proviruses were replication-competent at this time  
229 point. Collectively, these data indicate that the experimental cure achieved in this study was at  
230 least partially due to the reactivation of latent HIV-1 reservoirs in the WIPE assay.

231

232 **Genetic and epigenetic environment of the HIV-1 provirus impacts its drug susceptibility**  
233 **in the novel *in vitro* model.** We next investigated whether the drug susceptibility of various  
234 clones depends on the genetic and epigenetic environments of the HIV-1 provirus<sup>32</sup>. The  
235 proportion of ISs in the host genes was slightly decreased in EFdA- or EFdA + PEP005-treated  
236 cells (**Fig. 5a**). Changes in the epigenetic features of HIV-1 ISs during the initial phase of drug  
237 treatment were also apparent (**Fig. 5b**). EFdA treatment decreased the proportion of ISs with  
238 histone modifications, such as H3K27ac (indicative of open chromatin) and H3K36me3  
239 (present in actively transcribed gene bodies). Theoretically, cells harboring HIV-1 proviruses in  
240 an open chromatin region with H3K27ac and/or H3K36me3 modifications would be prone to  
241 the production of viral particles and have a reduced half-life because of viral cytopathic effects  
242 (**Fig. 5c**). This seems to be the case in the WIPE assay, because we observed that the EFdA or

243 EFdA + PEP005 treatment was more effective in reducing HIV-1 proviruses residing in the  
244 open chromatin regions than those in closed regions (**Fig. 5d**). HIV-1 proviruses lacking  
245 H3K27ac or H3K36me3 modifications were less susceptible to EFdA or EFdA + PEP005  
246 treatment than those with H3K27ac or H3K36me3 modifications; however, the addition of  
247 PEP005 reduced the absolute proviral DNA load both with and without these histone  
248 modifications compared with that of EFdA treatment alone (**Fig. 5d**). Collectively, these  
249 findings indicate that the epigenetic environment of integrated proviruses plays a role in  
250 determining susceptibility during the “shock and kill” strategy, providing a mechanistic insight  
251 into the specific factors of HIV-1-infected clones that contribute to LRA susceptibility.

252

## 253 **DISCUSSION**

254 A number of studies have demonstrated that recently developed small-molecule  
255 compounds have the ability to reverse latently HIV-1 infected cells<sup>5-8</sup>. The usage of LRAs aims  
256 to reactivate latent proviruses and induce production of HIV-1 virions or viral antigens. The  
257 host human DNA does not exist in its naked form but possesses histone proteins and forms a  
258 chromatin structure. Integrated HIV-1 proviral DNA is also under the same regulation as the  
259 human genome. Proviral transcription is controlled by a combination of host cellular  
260 transcription factors that drive HIV-1 LTR promoter and accessibility of the transcription  
261 factors to the HIV-1 LTR. The epigenetic environment of the provirus plays a role in  
262 determining accessibility of transcription factors to the 5’LTR (**Fig. 5c**). In addition, HIV-1  
263 preferentially integrates into gene bodies with active transcription, resulting in a high proportion  
264 of HIV-1 integration within the host gene body<sup>33</sup> (**Fig. 1f**). Transcriptional interference between  
265 the host genes and integrated proviruses is another factor that affects proviral transcription<sup>34,35</sup>.  
266 In line with this notion, a recent study reported that there is a higher proportion of intact  
267 proviruses integrated in the opposite orientation relative to the host genes in CD4<sup>+</sup> T cells of  
268 HIV-1-infected individuals<sup>20</sup>. These findings indicate that susceptibility to LRAs among

269 different HIV-1 clones is variable depending on the genetic and epigenetic environments of  
270 integrated proviruses. However, the *in vitro* latent models currently available for drug screening  
271 carry only one or two integrated HIV-1 proviruses with specific genetic and epigenetic patterns  
272 (**Fig. 1d**). Thus, a compound can potentially reactivate a specific HIV-1 provirus in a latent cell  
273 line but may not do so for other clones. To our knowledge, there is no *in vitro* model available  
274 for evaluating the effect of LRAs on a variety of HIV-1 clones at present. Thus, we established  
275 a new *in vitro* assay, termed WIPE, for evaluating HIV-1 persistence and latency and which  
276 harbors a thousand different clones with a similar distribution of HIV-1 proviruses as observed  
277 *in vivo* (**Fig. 1e and f**).

278 We utilized the WIPE assay to evaluate the reduction and eradication of replication  
279 competent HIV-1-DNA after a combination therapy of existing ART drug(s) with LRA(s). In  
280 the Jurkat/NL system, there is a continuous and dynamic viral infection, including *de novo*  
281 infection, cell apoptosis triggered by viral production, replication of uninfected cells, and  
282 generation of latently infected cells. ART drugs inhibit *de novo* infection from infected to  
283 uninfected cells, while LRAs activate latently infected cells and induce reactivation of viral  
284 antigen expression. As there are no antiviral CTLs and antibodies in the WIPE assay,  
285 elimination of reactivated cells is mostly due to viral cytopathicity or apoptosis of the  
286 reactivated cells. Notably, we recently reported that some LRAs, such as PEP005, strongly  
287 induce the upregulation of active caspase-3, resulting in enhanced apoptosis<sup>12,36</sup>. Thus, the  
288 addition of an LRA appeared to successfully accelerate the elimination of latently  
289 HIV-1-infected cells in the WIPE assay.

290 We further characterized the HIV-1 provirus during the WIPE assay and found that the  
291 epigenetic environment of the provirus plays a role in drug susceptibility (**Fig 5b–e**) by  
292 analyzing the relationship between the HIV-1 provirus and histone modifications associated  
293 with open chromatin regions (H3K27Ac and HeK36me3); however, other factors may also  
294 contribute to drug susceptibility. Utilizing the WIPE assay along with an in-depth

295 characterization of the HIV-1 provirus would provide further insights on the underlying  
296 mechanism of HIV-1 latency, which cannot be obtained using conventional latent cell lines.  
297 Further studies using the WIPE assay may also provide mechanistic insights on molecular  
298 targeting, not only by LRAs but also by novel strategies; for example, the “block-and-lock”  
299 strategy was recently proposed, in which particular agents lock the HIV-1 promoter in a deep  
300 latency state to prevent viral reactivation<sup>37,38</sup>.

301 The drug treatment with PEP005 and EFdA had a significant effect on the distribution of  
302 proviruses after only 3 weeks of treatment (**Fig 5d and e**), suggesting that we can evaluate  
303 LRAs without completing the full WIPE assay, which normally takes more than 15 weeks. This  
304 would increase the throughput of the WIPE assay as an *in vitro* screening model for LRA.  
305 Moreover, the WIPE assay is more similar to the situation *in vivo* than are conventional latent  
306 cell lines for HIV-1 in terms of heterogeneity of virus-infected clones. Nevertheless, compared  
307 with the WIPE assay host cells (the T cell line Jurkat), host cells *in vivo* are much more  
308 heterogenous. Recently, Battivelli et al.<sup>32</sup> reported that all tested LRAs could reactivate no more  
309 than 5% of cells with latent proviruses using their primary CD4<sup>+</sup> T cell model, suggesting that  
310 there is a wide variation in drug susceptibility to LRAs among different HIV-1-infected clones.  
311 Heterogeneity of the host CD4<sup>+</sup> T cells would also contribute to different drug susceptibility.  
312 Therefore, we propose the use of the WIPE assay to evaluate candidate LRA drugs for initial  
313 evaluation. Then, compounds with potent activity in the WIPE assay can be further evaluated by  
314 long-term drug assays using primary CD4<sup>+</sup> T cell-derived HIV-1 latent reservoir models<sup>39</sup> or  
315 animal models (i.e., HIV-1-infected humanized mice or SIV-infected macaques). This strategy  
316 may facilitate an increase in the efficiency of drug development for LRAs and help identify  
317 potent LRAs to reduce the reservoir size *in vivo*.

318 In this study, we used a Jurkat/NL system, which is a T cell-derived cell line (Jurkat) that  
319 possess the X4 HIV-1 variant. However, analyzing HIV-1-latency in monocytes or  
320 macrophages with the R5 HIV-1 variant is also very important. Thus, we obtained PM1CCR5

321 cells infected with R5-tropic HIV-1<sub>JRFL</sub> (PM1CCR5/JRFL) but failed to maintain long-term  
322 chronic infection to evaluate drug efficacy (data not shown). For future research, cell culture  
323 models with R5 HIV-1 infected, monocyte-derived cells would be important for analyzing the  
324 differences in the latency mechanisms between the X4 HIV-1 and R5 HIV-1 variants.

325 Taken together, our findings provide a proof-of-concept for the “shock and kill” strategy  
326 against HIV-1 infection using our newly established *in vitro* assay. A combination of the  
327 persistent and heterogeneous HIV-1 infection *in vitro* model and high-throughput  
328 characterization of HIV-1 proviruses will be useful in developing a new generation of LRAs  
329 specific for HIV-1 proviral latency and for optimizing drug combinations to reduce the HIV-1  
330 reservoir in an effort to achieve an HIV cure.

331

## 332 **METHODS**

333 **Drugs and reagents.** The anti-HIV-1 reverse-transcriptase inhibitor EFdA/MK-8591/ISL<sup>26</sup> and  
334 the protease inhibitor DRV<sup>40</sup> were synthesized, as previously described. PEP005 (PKC  
335 activator) was purchased from Cayman Chemical (Ann Arbor, MI); SAHA (vorinostat; HDAC  
336 inhibitor) from Santa Cruz Biotechnology (Dallas, TX); JQ-1 (BRD4 inhibitor) from BioVision  
337 (Milpitas, CA); GSK525762A (BRD4 inhibitor) from ChemScene (Monmouth Junction, NJ);  
338 Ro5-3335 from Merck (Darmstadt, Germany); and AI-10-49 (CBF $\beta$ /RUNX inhibitor) from  
339 Selleck (Houston, TX). Prostratin and Bryostatin-1 (PKC activator) were purchased from  
340 Sigma-Aldrich (St. Louis, MO), while Panobinostat (HDAC inhibitor), GS-9620 (TLR-7  
341 agonist), and Birinapant (IAP inhibitor) were purchased from MedChem Express (Monmouth  
342 Junction, NJ). Phorbol 12-myristate 13-acetate (PMA) and TNF- $\alpha$  were purchased from Wako  
343 Pure Chemical (Osaka, Japan) and BioLegend (San Diego, CA), respectively.

344

345 **Establishment of the HIV-1 chronically infected cell culture model.** Various T cell-derived  
346 cell lines [Jurkat, MT-4, Hut78, Molt4 (ATCC), Jurkat-LTR-GFP (JLTRG), and PM1-CCR5

347 (NIH AIDS Reagent Program)] were used to obtain cell populations with chronic HIV-1  
348 infection. Cells were infected with HIV-1<sub>NL4-3</sub> or HIV-1<sub>JRFL</sub> (PM1-CCR5) and cultured in RPMI  
349 1640 medium (Sigma-Aldrich) supplemented with 10% fetal calf serum (Sigma-Aldrich), 50  
350 U/mL penicillin, and 50 µg/mL kanamycin. Cells were passaged weekly to maintain cell  
351 numbers  $< 5 \times 10^6$  cells/mL when confluent. p24 levels in the supernatant were monitored using  
352 Lumipulse G1200 (FUJIREBIO, Tokyo, Japan). The number of cells with intracellular p24 was  
353 also monitored on day 30 after infection by flow cytometry (as described below).

354

355 **HIV-1 reversal in latently infected cells and caspase-3 activation by LRAs.** Chronically  
356 HIV-1<sub>NL4-3</sub>-infected Jurkat/NL cells were treated with 1 of the 11 drugs (1 µM) for 24 h, after  
357 which changes in supernatant p24 levels and induction of caspase-3 activation were determined  
358 by flow cytometry.

359

360 **Flow cytometry analysis.** The ratios of intracellular HIV-1 p24<sup>+</sup> cells, GFP<sup>+</sup> cells, and the  
361 active form of caspase-3 expression were determined as previously described<sup>9,12,36</sup>. Briefly,  
362 Jurkat/NL or JLTRG/NL cells were washed twice with phosphate buffered salts (PBS) and  
363 stained with Ghost Dye Red 780 (TONBO Biosciences, San Diego, CA) for 30 min at 4°C. The  
364 cells were then fixed with 1% paraformaldehyde/PBS for 20 min, and permeabilized in a flow  
365 cytometry perm buffer (TONBO Biosciences). After 5-min incubation at room temperature (25–  
366 30°C), cells were stained with anti-HIV-1 p24 (24-4)-fluorescein isothiocyanate (FITC)  
367 monoclonal antibody (mAb; Santa Cruz Biotechnology) and/or Alexafluor 647-conjugated  
368 anti-active caspase-3 mAb (C92-605; BD Pharmingen, San Diego, CA) for 30 min on ice. For  
369 propidium iodide (PI)/annexin V staining, cells were washed twice with PBS and resuspended  
370 in annexin V binding buffer (BioLegend) at a concentration of  $1 \times 10^7$  cells/mL. The cells were  
371 then stained with FITC annexin V (BioLegend) and PI solution (BioLegend) for 15 min at room  
372 temperature. Cells were analyzed using a BD FACSVerser flow cytometer (BD Biosciences,

373 Franklin Lakes, NJ). Data collected were analyzed using FlowJo software (Tree Star, Inc.,  
374 Ashland, OR).

375

376 **Sorting of GFP<sup>+</sup> or GFP<sup>-</sup> cells from HIV-1<sub>NL4-3</sub>-infected JLTRG cells.** HIV-infected  
377 Jurkat-LTR-GFP cells ( $6 \times 10^6$ ) were resuspended in FACS buffer (PBS with 1% fetal calf  
378 serum), after which GFP<sup>+</sup> or GFP<sup>-</sup> cells were sorted using BD FACS Aria I (BD Biosciences).  
379 The sorted GFP<sup>-</sup> cells were stimulated with 10 ng/mL TNF- $\alpha$  for 6 h and then GFP expression  
380 levels were analyzed using BD FACSVerser (BD Biosciences). The level of *gag* expression after  
381 18-h stimulation with 10 ng/mL TNF- $\alpha$  was analyzed by reverse-transcription (RT)-digital  
382 droplet PCR (ddPCR). ddPCR droplets were generated using the QX200 droplet generator  
383 (Bio-Rad Laboratories, Hercules, CA). RT-PCR was performed using a C1000 Touch thermal  
384 cycler (Bio-Rad Laboratories) with the primers listed in [Supplementary Table 2](#). The  
385 *gag*-positive and negative droplets were quantified based on fluorescence using the QX200  
386 droplet reader (Bio-Rad Laboratories).

387

388 **Determination of antiviral activity of LRAs and conventional anti-HIV-1 drugs in**  
389 **Jurkat/NL cells (WIPE assay).** Jurkat/NL cells ( $5.0 \times 10^4$  cells/ml) were treated with a drug  
390 (e.g., EFdA, DRV, or PEP005) or a combination of drugs in a 12-well plate. Culture medium  
391 was exchanged and the drug was added. Drug treatment was stopped approximately on week 9  
392 and the culture was maintained for an additional 8 weeks without drug supplementation.  
393 Supernatant p24 levels and intracellular HIV-1-DNA levels were monitored weekly during cell  
394 culture. At the end of each experiment, drug-treated cells with low/undetectable supernatant p24  
395 levels were stimulated with 10 ng/mL TNF- $\alpha$  to confirm viral recurrence.

396

397 **Isolation of PBMCs from patients with HIV-1.** The study was performed in accordance with  
398 the guidelines of the Declaration of Helsinki. Analysis of clinical samples shown in [Fig. 1e](#) was



399 conducted based on a protocol reviewed and approved by the Kumamoto University  
400 (Kumamoto, Japan) Institutional Review Board (approval number Genome 258).

401           Peripheral blood samples analyzed as shown in **Supplementary Fig. 4** were  
402 collected from patients infected with HIV-1 before or after receiving cART for at least 7 years.  
403 The Ethics Committee of the National Center for Global Health and Medicine (Tokyo, Japan)  
404 approved this study (NCGM-G-002259-00). Informed written consent was obtained from all  
405 patients (**Supplementary Table 1**) prior to the study. All subjects maintained low viral loads (<  
406 20 copies/mL; except for occasional blips) during therapy. CD4<sup>+</sup> T-cell counts in peripheral  
407 blood samples ranged from 447 to 632 cells/mm<sup>3</sup> (average 529 cells/ mm<sup>3</sup>). The plasma viral  
408 loads were < 20 copies/mL, as determined by quantitative PCR (Roche COBAS  
409 AmpliPrep/COBAS TaqMan HIV-1 Test version 2.0) at the time of enrollment in the study.  
410 PBMCs were isolated from whole blood by density-gradient centrifugation using  
411 Ficoll-Paque™ (GE Healthcare, Chicago, IL). Total cellular DNA was extracted and used in  
412 subsequent PCR experiments.

413  
414 **Quantification of intracellular HIV-1 DNA levels.** Total cellular DNA was extracted from  
415 cells (cell lines or PBMCs) using a QIAmp DNA Blood mini kit (Qiagen, Hilden, Germany)  
416 according to manufacturer's instructions. Quantitative PCR (qPCR) analysis of intracellular  
417 HIV-1 DNA levels was conducted using Premix Ex Taq (Probe qPCR) Rox plus (Takara Bio,  
418 Kusatsu, Japan). The oligonucleotides HIV-1 LTR and  $\beta$ 2-microglobulin were used for HIV-1  
419 DNA quantification and cell number determination, respectively (primer sequences are provided  
420 in **Supplementary Table 2**<sup>41-44</sup>). HIV-1 proviral DNA copy and cell numbers were calculated  
421 based on a standard curve generated using a serially diluted pNL4-3 plasmid and DNA  
422 extracted from Jurkat cells, respectively.

423

424 **RT-qPCR for HIV-1 mRNA quantification.** Total cellular RNA was extracted from Jurkat

425 cells infected with HIV-1 using the RNeasy Mini Kit (Qiagen) according to manufacturer's  
426 instructions. cDNA was synthesized using the PrimeScript RT Master Mix (Takara Bio).  
427 RT-qPCR analysis of intracellular HIV-1 RNA was performed using PowerUp SYBR Green  
428 Master Mix (Applied Biosystems, Foster City, CA). Primer sequences used for the detection of  
429 HIV-1-RNA and  $\beta$ -actin gene are listed in **Supplementary Table 2**. To determine the  
430 reactivation of HIV-1 in Jurkat/NL cells, relative HIV-1-RNA expression levels were  
431 normalized to that of  $\beta$ -actin gene.

432

433 **Amplification of near full-length single HIV-1 genome and sequencing.** Nearly full-length  
434 single HIV-1 genome PCR was performed as described previously<sup>28</sup> with minor modifications.  
435 Briefly, genomic DNA was diluted to the single-genome level based on ddPCR and Poisson  
436 distribution statistics. The resulting single genome was amplified using Takara Ex Taq hot start  
437 version (first-round amplification). PCR conditions for first-round amplification consisted of  
438 95°C for 2 min; followed by 5 cycles of 95°C for 10 s, 66°C for 10 s, and 68°C for 7 min; 5  
439 cycles of 95°C for 10s, 63°C for 10 s, and 68°C for 7 min; 5 cycles of 95°C for 10 s, 61°C for  
440 10 s, and 68°C for 7 min; 15 cycles of 95°C for 10 s, 58°C for 10 s, and 68°C for 7 min; and  
441 finally, 68°C for 5 min. First-round PCR products were diluted 1:50 in PCR-grade water and 5  
442  $\mu$ L of the diluted mixture was subjected to second-round amplification. PCR conditions for the  
443 second-round amplification were as follows, 95°C for 2 min; followed by 8 cycles of 95°C for  
444 10 s, 68°C for 10 s, and 68°C for 7 min; 12 cycles of 95°C for 10 s, 65°C for 10 s, and 68°C for  
445 7 min; and finally, 68°C for 5 min. Primer information is provided in **Supplementary Table 2**.  
446 PCR products were then visualized by electrophoresis on a 1% agarose gel. Based on Poisson  
447 distribution, samples with  $\leq 30\%$  positive reactions were considered to contain a single HIV-1  
448 genome and were selected for sequencing. Amplified PCR products of the selected samples  
449 were purified using a QIAquick PCR Purification Kit (Qiagen) according to manufacturer's  
450 instructions. Purified PCR products were sheared by sonication using a Picoruptor device

451 (Diagenode, Liege, Belgium) to obtain fragments with an average size of 300–400 bp. Libraries  
452 for next-generation sequencing (NGS) were prepared using the NEBNext Ultra II DNA Library  
453 Prep Kit for Illumina (New England Biolabs, Ipswich, MA) according to manufacturer’s  
454 instructions. Concentration of library DNA was determined using the Qubit dsDNA High  
455 Sensitivity Assay kit (Invitrogen, Carlsbad, CA). The libraries were subsequently pooled  
456 together, followed by quantification using the Agilent 2200 TapeStation and quantitative PCR  
457 (GenNext NGS Library Quantification kit; Toyobo, Osaka, Japan), and sequenced using the  
458 Illumina MiSeq platform (Illumina, San Diego, CA). The resulting short reads were cleaned  
459 using an in-house Perl script (kindly provided by Dr. Michi Miura, Imperial College London,  
460 UK), which extracts reads with a high index-read sequencing quality (Phred score > 20) in each  
461 position of an 8-bp index read. Next, adapter sequences from Read1 and Read2 were removed,  
462 followed by a cleaning step to remove reads that were too short or had a very low Phred score,  
463 as previously described<sup>24</sup>. The clean sequencing reads were aligned with the NL4-3 reference  
464 genome (GenBank-M19921) using the BWA-MEM algorithm<sup>45</sup>. Further data processing and  
465 cleanup, including the removal of reads with multiple alignments and duplicated reads, were  
466 performed using Samtools<sup>45</sup> and Picard (<http://broadinstitute.github.io/picard/>). The aligned  
467 reads were visualized using Integrative Genomics Viewer<sup>46</sup>, and consensus sequences were  
468 copied and aligned using MUSCLE<sup>47</sup>. NGS analyses of nearly full-length HIV-1 PCR products  
469 from PBMCs of HIV-1-infected individuals were conducted using MinION platform with Flow  
470 Cell R9.4.1 and Rapid Barcoding kit (Oxford Nanopore Technologies, Oxford, UK), according  
471 to manufacturer’s instructions. Sequencing reads cleaned using EPI2ME software (Oxford  
472 Nanopore Technologies) were aligned and analyzed as described above.

473

474 **Ligation-mediated PCR (LM-PCR).** Detection of HIV-1 ISs was performed using  
475 ligation-mediated PCR and high-throughput sequencing, as previously described<sup>24</sup> but with  
476 minor modifications. Briefly, cellular genomic DNA was sheared by sonication using the

477 Picoruptor device to obtain fragments with an average size of 300–400 bp. DNA ends were  
478 repaired using the NEBNext Ultra II End Repair Kit (New England Biolabs) and a DNA linker<sup>24</sup>  
479 was added. The junction between the 3′LTR of HIV-1 and host genomic DNA was amplified  
480 using a primer targeting the 3′LTR and a primer targeting the linker<sup>24</sup>. PCR amplicons were  
481 purified using the QIAquick PCR Purification Kit (Qiagen) according to manufacturer’s  
482 instructions. This was followed by Ampure XP bead purification(Beckman Coulter). Purified  
483 PCR amplicons were quantified using Agilent 2200 TapeStation and quantitative PCR  
484 (GenNext NGS library quantification kit; Toyobo). LM-PCR libraries were sequenced using the  
485 Illumina MiSeq as paired-end reads, and the resulting FASTQ files were analyzed as previously  
486 described<sup>24</sup>. A circos plot showing virus ISs in the Jurkat/NL4-3 model and different cell lines  
487 was constructed using the OmicCircos tool available as a package in R software<sup>48</sup>.

488

489 **Bioinformatic analysis.** Bed files containing the IS information were generated from the  
490 analyzed exported files. Data on RefSeq genes were obtained using UCSC Genome Browser  
491 (<https://genome.ucsc.edu/>) and the positions of RefSeq genes were compared with those of IS  
492 using the R package hiAnnotator (<http://github.com/malnirav/hiAnnotator>). Histone  
493 modifications of primary helper memory T cells from peripheral blood were obtained from  
494 ChIP-Seq datasets from the ENCODE project<sup>49</sup>. The relationship between HIV-1 ISs and  
495 histone modifications was analyzed as previously described<sup>24</sup>.

496

497 **Statistical analysis.** Differences between groups were analyzed for statistical significance using  
498 the Mann-Whitney U test and log-rank test. Data were analyzed using a chi-squared test with  
499 Prism 7 software (GraphPad Software, Inc., La Jolla, CA), unless otherwise stated. Statistical  
500 significance was defined as  $P < 0.05$ .

501

502 **REFERENCES**

- 503 1. Finzi, D. *et al.* Identification of a reservoir for HIV-1 in patients on highly active  
504 antiretroviral therapy. *Science* **278**, 1295–1300 (1997).
- 505 2. Siliciano, J. D. *et al.* Long-term follow-up studies confirm the stability of the latent  
506 reservoir for HIV-1 in resting CD4<sup>+</sup> T cells. *Nat. Med.* **9**, 727–728 (2003).
- 507 3. Chun, T. W., Davey, R. T., Jr., Engel, D., Lane, H. C. & Fauci, A. S. Re-emergence of  
508 HIV after stopping therapy. *Nature* **401**, 874–875 (1999).
- 509 4. Richman, D. D. *et al.* The challenge of finding a cure for HIV infection. *Science* **323**,  
510 1304–1307 (2009).
- 511 5. Laird, G. M. *et al.* Ex vivo analysis identifies effective HIV-1 latency-reversing drug  
512 combinations. *J. Clin. Invest.* **125**, 1901–1912 (2015).
- 513 6. Jiang, G. *et al.* Synergistic Reactivation of Latent HIV Expression by  
514 Ingenol-3-Angelate, PEP005, Targeted NF- $\kappa$ B Signaling in Combination with JQ1  
515 Induced p-TEFb Activation. *PLoS Pathog.* **11**, e1005066 (2015).
- 516 7. Bullen, C. K., Laird, G. M., Durand, C. M., Siliciano, J. D. & Siliciano, R. F. New ex  
517 vivo approaches distinguish effective and ineffective single agents for reversing HIV-1  
518 latency in vivo. *Nat. Med.* **20**, 425–429 (2014).
- 519 8. Cillo, A. R. *et al.* Quantification of HIV-1 latency reversal in resting CD4<sup>+</sup> T cells from  
520 patients on suppressive antiretroviral therapy. *Proc. Natl. Acad. Sci. U. S. A.* **111**, 7078–  
521 7083 (2014).
- 522 9. Matsuda, K. *et al.* Benzolactam-related compounds promote apoptosis of HIV-infected  
523 human cells via protein kinase C-induced HIV latency reversal. *J. Biol. Chem.* **294**,  
524 116–129 (2019).
- 525 10. Kim, Y., Anderson, J. L. & Lewin, S. R. Getting the "Kill" into "Shock and Kill":  
526 Strategies to Eliminate Latent HIV. *Cell Host Microbe* **23**, 14–26 (2018).
- 527 11. Badley, A. D., Sainski, A., Wightman, F. & Lewin, S. R. Altering cell death pathways  
528 as an approach to cure HIV infection. *Cell Death Dis.* **4**, e718 (2013).
- 529 12. Hattori, S. I. *et al.* Combination of a Latency-Reversing Agent With a Smac Mimetic  
530 Minimizes Secondary HIV-1 Infection in vitro. *Front. Microbiol.* **9**, 2022 (2018).
- 531 13. Søgaard, O. S. *et al.* The Depsipeptide Romidepsin Reverses HIV-1 Latency In Vivo.  
532 *PLoS Pathog.* **11**, e1005142 (2015).
- 533 14. Rasmussen, T. A. *et al.* Panobinostat, a histone deacetylase inhibitor, for latent-virus  
534 reactivation in HIV-infected patients on suppressive antiretroviral therapy: a phase 1/2,  
535 single group, clinical trial. *Lancet HIV* **1**, e13–21 (2014).

- 536 15. Elliott, J. H. *et al.* Short-term administration of disulfiram for reversal of latent HIV  
537 infection: a phase 2 dose-escalation study. *Lancet HIV* **2**, e520–529 (2015).
- 538 16. Archin, N. M. *et al.* Administration of vorinostat disrupts HIV-1 latency in patients on  
539 antiretroviral therapy. *Nature* **487**, 482–485 (2012).
- 540 17. Maldarelli, F. *et al.* HIV latency. Specific HIV integration sites are linked to clonal  
541 expansion and persistence of infected cells. *Science* **345**, 179–183 (2014).
- 542 18. Wagner, T. A. *et al.* HIV latency. Proliferation of cells with HIV integrated into cancer  
543 genes contributes to persistent infection. *Science* **345**, 570–573 (2014).
- 544 19. Cohn, L. B. *et al.* HIV-1 integration landscape during latent and active infection. *Cell*  
545 **160**, 420–432 (2015).
- 546 20. Einkauf, K. B. *et al.* Intact HIV-1 proviruses accumulate at distinct chromosomal  
547 positions during prolonged antiretroviral therapy. *J. Clin. Invest.* **129**, 988–998 (2019).
- 548 21. Ho, Y. C. *et al.* Replication-competent noninduced proviruses in the latent reservoir  
549 increase barrier to HIV-1 cure. *Cell* **155**, 540–551 (2013).
- 550 22. Borducchi, E. N. *et al.* Antibody and TLR7 agonist delay viral rebound in  
551 SHIV-infected monkeys. *Nature* **563**, 360–364 (2018).
- 552 23. Gillet, N. A. *et al.* The host genomic environment of the provirus determines the  
553 abundance of HTLV-1-infected T-cell clones. *Blood* **117**, 3113–3122 (2011).
- 554 24. Satou, Y. *et al.* Dynamics and mechanisms of clonal expansion of HIV-1-infected cells  
555 in a humanized mouse model. *Sci. Rep.* **7**, 6913 (2017).
- 556 25. Symons, J. *et al.* HIV integration sites in latently infected cell lines: evidence of  
557 ongoing replication. *Retrovirology* **14**, 2 (2017).
- 558 26. Nakata, H. *et al.* Activity against human immunodeficiency virus type 1, intracellular  
559 metabolism, and effects on human DNA polymerases of  
560 4'-ethynyl-2-fluoro-2'-deoxyadenosine. *Antimicrob. Agents Chemother.* **51**, 2701–2708  
561 (2007).
- 562 27. Salie, Z. L. *et al.* Structural basis of HIV inhibition by translocation-defective RT  
563 inhibitor 4'-ethynyl-2-fluoro-2'-deoxyadenosine (EFdA). *Proc. Natl. Acad. Sci. U. S. A.*  
564 **113**, 9274–9279 (2016).
- 565 28. Imamichi, H. *et al.* Defective HIV-1 proviruses produce novel protein-coding RNA  
566 species in HIV-infected patients on combination antiretroviral therapy. *Proc. Natl. Acad.*  
567 *Sci. U. S. A.* **113**, 8783–8788 (2016).
- 568 29. Sanchez, G., Xu, X., Chermann, J. C. & Hirsch, I. Accumulation of defective viral

- 569 genomes in peripheral blood mononuclear cells of human immunodeficiency virus type  
570 1-infected individuals. *J. Virol.* **71**, 2233–2240 (1997).
- 571 30. Bruner, K. M. *et al.* Defective proviruses rapidly accumulate during acute HIV-1  
572 infection. *Nat. Med.* **22**, 1043–1049 (2016).
- 573 31. Abner, E. & Jordan, A. HIV "shock and kill" therapy: In need of revision. *Antiviral Res.*  
574 **166**, 19–34 (2019).
- 575 32. Battivelli, E. *et al.* Distinct chromatin functional states correlate with HIV latency  
576 reactivation in infected primary CD4(+) T cells. *Elife* **7**, e34655 (2018).
- 577 33. Schroder, A. R. *et al.* HIV-1 integration in the human genome favors active genes and  
578 local hotspots. *Cell* **110**, 521–529 (2002).
- 579 34. Han, Y. *et al.* Orientation-dependent regulation of integrated HIV-1 expression by host  
580 gene transcriptional readthrough. *Cell Host Microbe* **4**, 134–146 (2008).
- 581 35. Lenasi, T., Contreras, X. & Peterlin, B.M. Transcriptional interference antagonizes  
582 proviral gene expression to promote HIV latency. *Cell Host Microbe* **4**, 123–133  
583 (2008).
- 584 36. Matsuda, K. *et al.* Inhibition of HIV-1 entry by the tricyclic coumarin GUT-70 through  
585 the modification of membrane fluidity. *Biochem. Biophys. Res. Commun.* **457**, 288–294  
586 (2015).
- 587 37. Darcis, G., Van Driessche, B. & Van Lint, C. HIV Latency: Should We Shock or Lock?  
588 *Trends Immunol.* **38**, 217–228 (2017).
- 589 38. Kessing, C. F. *et al.* In Vivo Suppression of HIV Rebound by Didehydro-Cortistatin A,  
590 a "Block-and-Lock" Strategy for HIV-1 Treatment. *Cell Rep.* **21**, 600–611 (2017).
- 591 39. Saleh, S. *et al.* CCR7 ligands CCL19 and CCL21 increase permissiveness of resting  
592 memory CD4+ T cells to HIV-1 infection: a novel model of HIV-1 latency. *Blood* **110**,  
593 4161–4164 (2007).
- 594 40. Koh, Y. *et al.* Novel bis-tetrahydrofuranylurethane-containing nonpeptidic protease  
595 inhibitor (PI) UIC-94017 (TMC114) with potent activity against multi-PI-resistant  
596 human immunodeficiency virus in vitro. *Antimicrob. Agents Chemother.* **47**, 3123–3129  
597 (2003).
- 598 41. Butler, S. L., Hansen, M. S. & Bushman, F. D. A quantitative assay for HIV DNA  
599 integration in vivo. *Nat. Med.* **7**, 631–634 (2001).
- 600 42. Goff, L. K. *et al.* The use of real-time quantitative polymerase chain reaction and  
601 comparative genomic hybridization to identify amplification of the REL gene in



- 602 follicular lymphoma. *Br. J. Haematol.* **111**, 618–625 (2000).
- 603 43. Douek, D. C. *et al.* HIV preferentially infects HIV-specific CD4<sup>+</sup> T cells. *Nature* **417**,  
604 95–98 (2002).
- 605 44. Lee, G. Q. *et al.* Clonal expansion of genome-intact HIV-1 in functionally polarized  
606 Th1 CD4<sup>+</sup> T cells. *J. Clin. Invest.* **127**, 2689–2696 (2017).
- 607 45. Li, H. & Durbin, R. Fast and accurate short read alignment with Burrows-Wheeler  
608 transform. *Bioinformatics* **25**, 1754–1760 (2009).
- 609 46. Robinson, J. T. *et al.* Integrative genomics viewer. *Nat. Biotechnol.* **29**, 24–26 (2011).
- 610 47. Edgar, R. C. MUSCLE: multiple sequence alignment with high accuracy and high  
611 throughput. *Nucleic Acids Res.* **32**, 1792–1797 (2004).
- 612 48. Hu, Y. *et al.* OmicCircos: A Simple-to-Use R Package for the Circular Visualization of  
613 Multidimensional Omics Data. *Cancer Inform.* **13**, 13–20 (2014).
- 614 49. EBCODE Project Consortium. An integrated encyclopedia of DNA elements in the  
615 human genome. *Nature* **489**, 57–74 (2012).
- 616

617

## 618 **Acknowledgements**

619 We thank Jumpei Ito for providing access to the Python program, allowing us to perform  
620 association analyses between the epigenetic environment and viral integration sites. This  
621 research was supported in part by grants from the Japan Agency for Medical Research and  
622 Development (grant numbers JP19fk0410015 to K.T., Y.S., and Ke.M.; JP19fk0410009 to Y.S.;  
623 JP19fk0410023 to K.T., P.M., and Y.S.; and JP19fk0410014 to Y.S.). Y.S. was also supported  
624 by grants from MEXT/JSPS KAKENHI (JP17890606) and JST MIRAI. K.T. and Ke.M. were  
625 also supported by a grant from the National Center for Global Health and Medicine, Japan  
626 (29a1010).

627

## 628 **Author contributions**

629 K.Y., Y.S., and Ke.M. designed the study. Ko.M., S.I., K.T., S.H., H.K., P.M., M.M., and  
630 N.S.D. performed the experiments. S.M. provided patient sample DNA. S.I., B.J.Y.T., and Y.S.



631 performed bioinformatic analysis. H.G., S.O., S.M., H.M., Y.S., and Ke.M. supervised the work.

632 Y.S. and Ke.M. wrote the manuscript with input from all authors.

633

634 **Competing interests**

635 The authors declare no competing financial or non-financial interests.

636

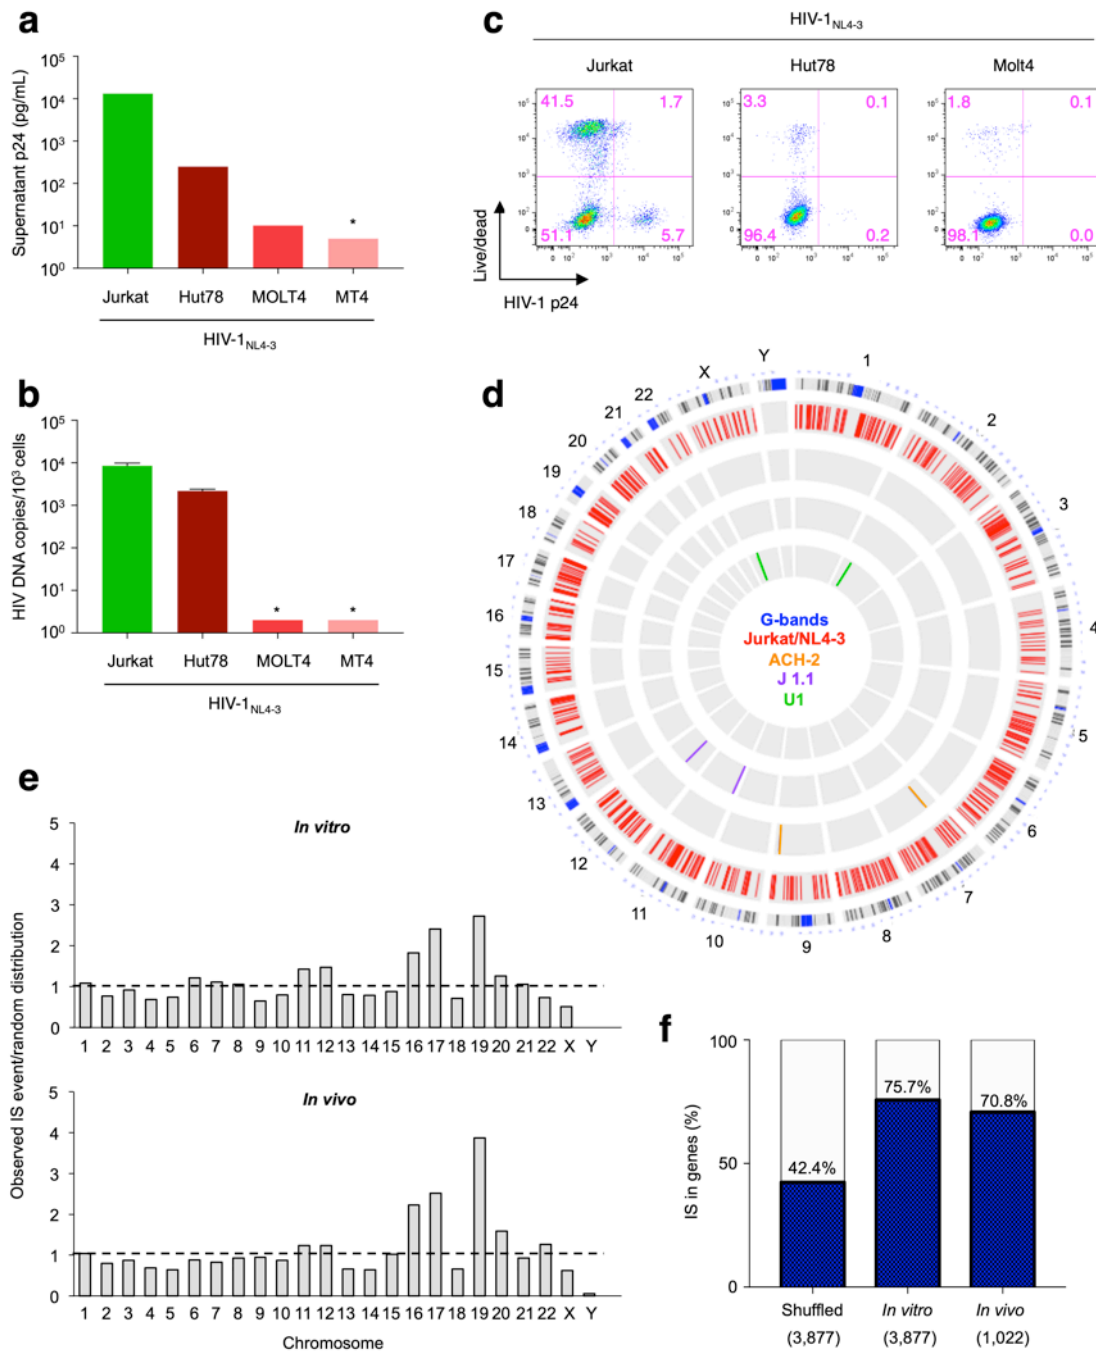

**Fig. 1 | Establishment of a new *in vitro* HIV-1 infection model.** To establish a cell culture model of long-term persistent HIV-1 infection, various T-cell lines (Jurkat, Hut78, MOLT4, and MT-4 cells) were used. HIV-1 production (a) and copies of intracellular HIV-1 DNA (b) on day 30 of each cell line c, Co-existence of p24-positive and p24-negative cell populations in HIV-1–infected Jurkat, Hut78, and MOLT4 cell lines. The percentage of intracellular p24-positive cells

was analyzed by flow cytometry. **d**, Circos plot depicting viral integration sites (IS) across the human genome in the Jurkat/NL system and in different cell lines *in vitro*. Each chromosome is presented on the outer circle and is broken down into sequential bins. Blue/black, red, orange, purple, and green bars indicate G-bands, Jurkat/NL system, ACH-2, J1.1, and U1, respectively. **e**, Comparison of HIV-1 IS frequency in the individual chromosomes in the *in vitro* model (Jurkat/NL) and *in vivo* in PBMCs from five HIV-1-infected individuals. The y-axis depicts the proportion of integration events observed relative to random distribution, with a horizontal dashed black line set at a value of 1. **f**, Relationship between HIV-1 IS and the host genes, *in vitro* and *in vivo*, compared via random distribution. Numbers in parentheses at the bottom of the bars indicate the numbers of unique ISs observed; numbers at the top of the bars indicate the percentage of HIV-1 proviruses integrated within the host genes in each group. Asterisk (\*) stands for below detection limit.

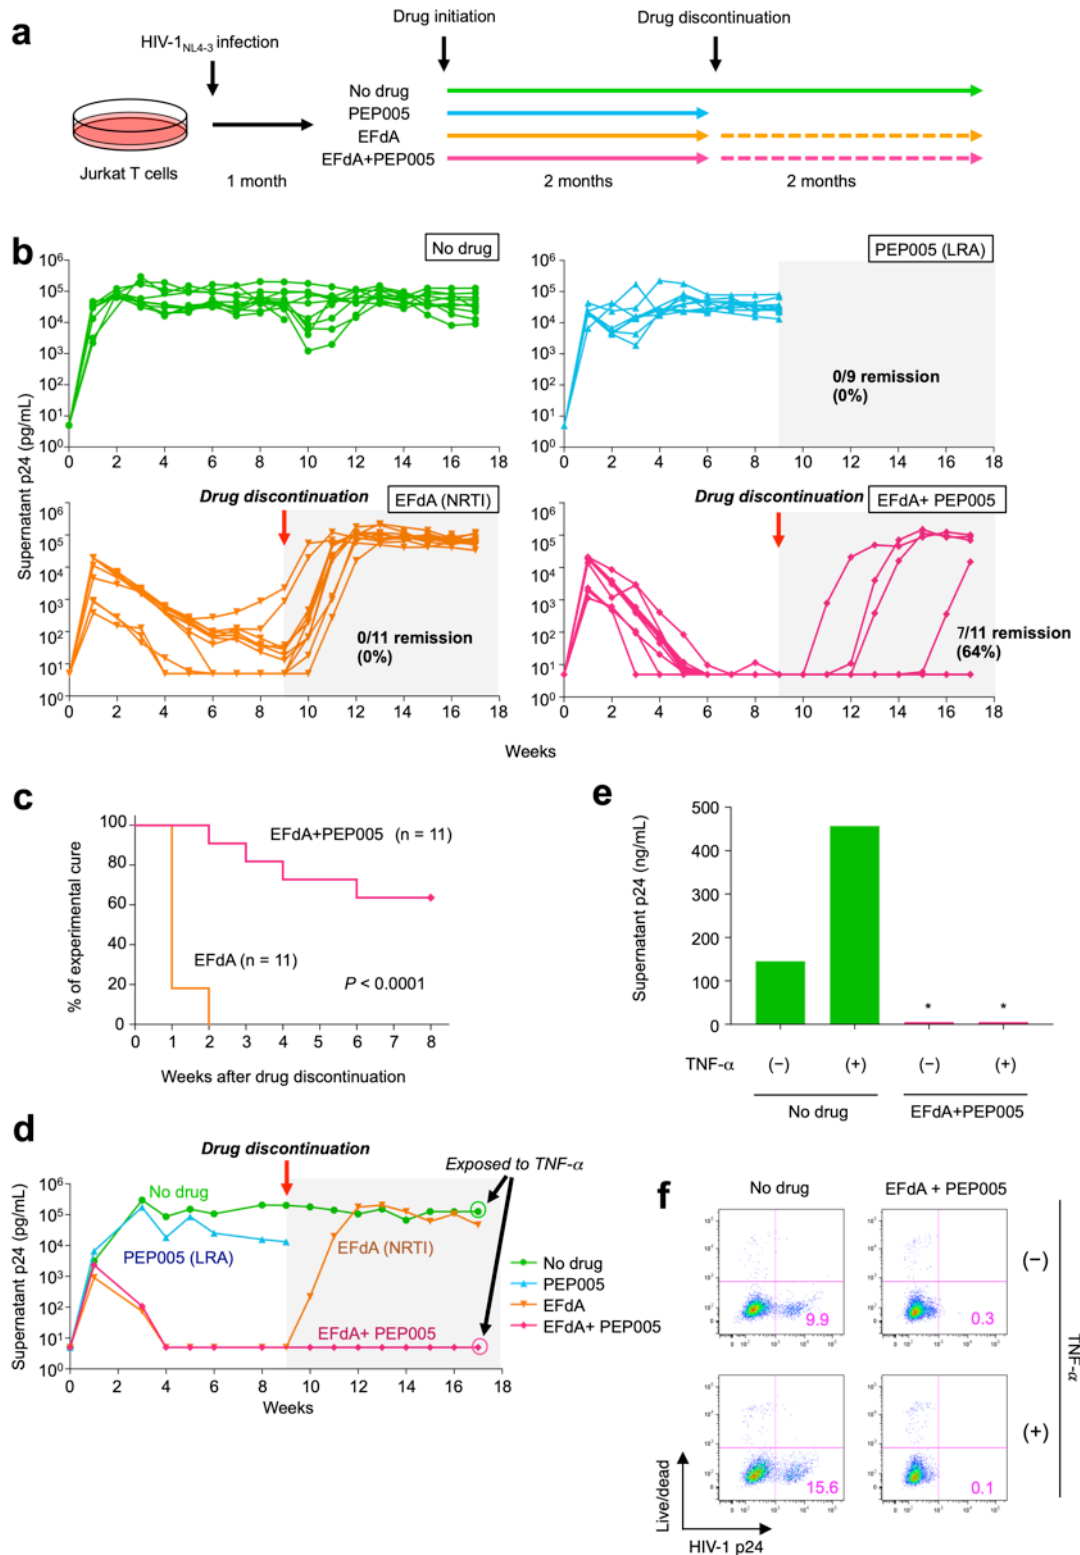

**Fig. 2 | Effect of drug treatments on viral persistence in the new *in vitro* infection model. a,** Assay overview. Schematic representation of the assay protocol involving the HIV-1<sub>NL4-3</sub>

infected cell culture model (Jurkat/NL cells). **b**, Changes in supernatant p24 levels without drugs, with 5 nM PEP005 or 50 nM EFdA, or with a combination of 50 nM EFdA and 5 nM PEP005 (n = 11, 9, 11, and 11, respectively). Drug treatment was terminated on week 9 but analysis continued for an additional 8 weeks. **c**, Log-rank test comparison of the percentage of non-recurrence in the EFdA single treatment and the combination treatment. **d**, Changes in supernatant p24 levels in a representative experiment (Exp. 1) from experiments shown in **Fig. 2b**. **e–f**, Assessment of the viral rebound in Jurkat/NL cells after drug discontinuation. Cells treated with drugs or untreated cells were stimulated with TNF- $\alpha$  (10 ng/mL) in week 17, and supernatant p24 (**e**) and intracellular p24 levels (**f**) were analyzed on day 6 after stimulation. Asterisk (\*) denotes below detection limit.

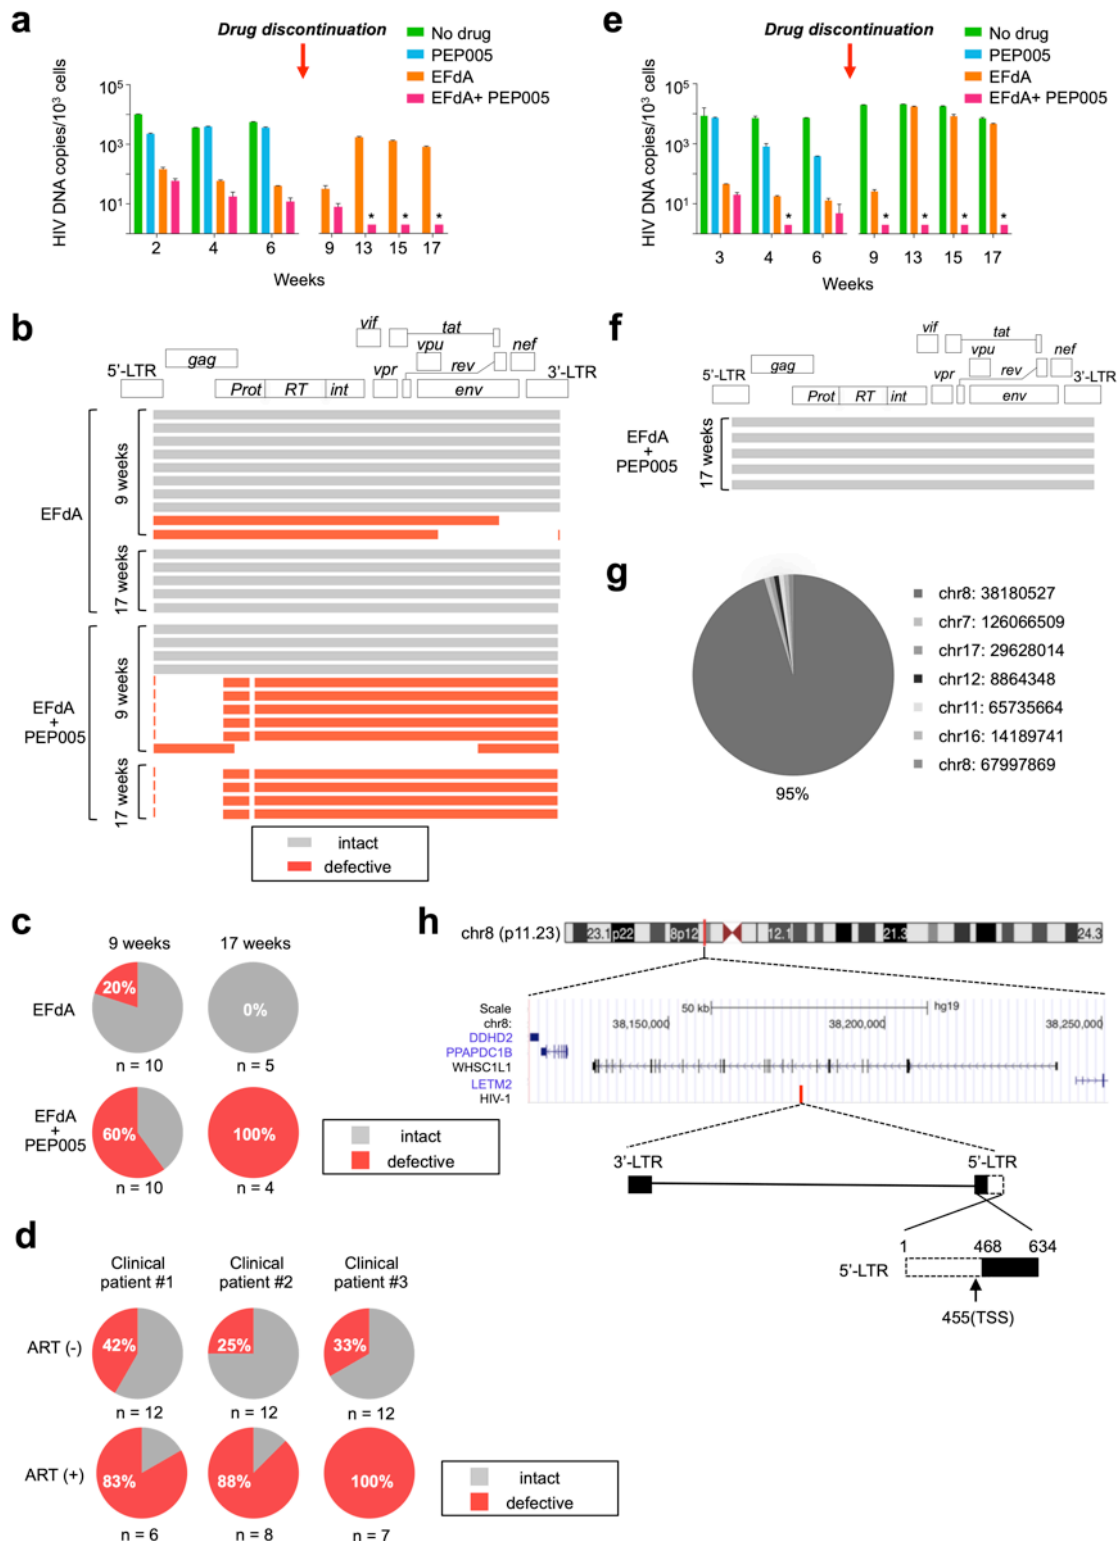

**Fig. 3 | Mechanisms underlying experimental cure *in vitro*.** **a**, Quantification of intracellular copies of HIV-1 DNA at each time point in Exp. 6 (**Supplementary Fig. 3a**). **b**, Schematic

representation of the individual provirus structures from two different treatment groups and at two time points in Exp. 6. Each horizontal bar represents an individual HIV-1 genome, as determined by amplification of near full-length HIV-1 DNA from a single HIV-1 genome and DNA sequencing. The gray bars denote full-length types and the red bars indicate defective proviruses. **c**, Pie charts reflecting the proportion of defective and intact proviruses in Exp. 6. **d**, Pie charts reflecting the proportion of defective and intact proviruses in PBMCs from three HIV-infected individuals. **e**, Quantification of intracellular copies of HIV-1 DNA at each time point in Exp. 1 (**Fig. 2d**). **f**, Schematic representation of the individual provirus structures in Exp. 1 for the EFdA/PEP005 culture group 17 weeks after drug treatment initiation. **g**, Pie chart showing the relative abundance of each HIV-1-infected clone. Chromosomal number and position of each clone is shown in the right panel. **h**, Schematic figure of the provirus structure and IS in the expanded clone. A 467-bp deletion in the 5'-end of 5'LTR was observed. TSS, transcription start site. Asterisk (\*) stands for below detection limit.

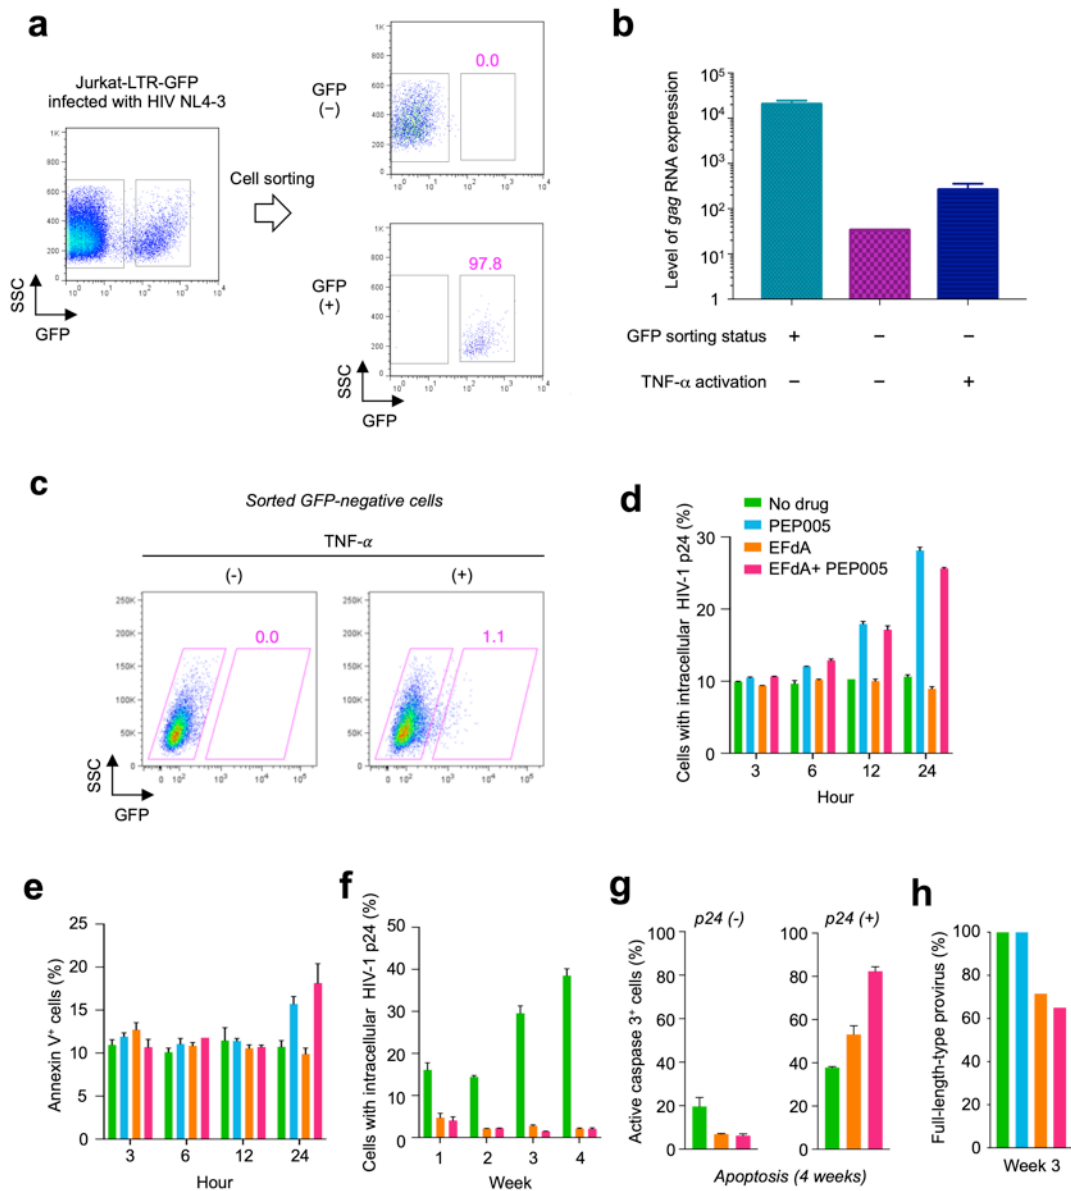

**Fig. 4 | Proof-of-concept of the “shock and kill” strategy of the WIPE assay.** **a**, Sorting of GFP-positive cells among HIV-1-infected Jurkat-LTR-GFP cells. GFP-positive (Tat<sup>+</sup>) or GFP-negative populations (Tat<sup>-</sup>) among HIV-1-infected Jurkat-LTR-GFP cells were sorted. **b**, GFP-negative cells were stimulated with 10 ng/mL TNF- $\alpha$  for 6 h and *gag* mRNA expression was quantified. **c**, GFP expression in sorted GFP-negative Jurkat-LTR-GFP cells infected with HIV-1<sub>NL4-3</sub> was analyzed after 6 h of TNF- $\alpha$  stimulation (10 ng/mL). **d–e**, p24 expression and cell apoptosis during the early phase of drug treatment. Bar graphs show the change in the



percentage of cells expressing intracellular HIV-1 p24 (**d**) and annexin V (**e**) during the initial 24 h of drug treatment. **f**, Changes in the numbers of cells with intracellular p24 (weeks 1–4). **g**, Percentages of active caspase-3-positive cells in the p24-positive or p24-negative cell population. **h**, Percentages of full-length-type HIV-1 provirus after 3 weeks of drug treatment. Data represent the mean  $\pm$  S.D. of three independent experiments.

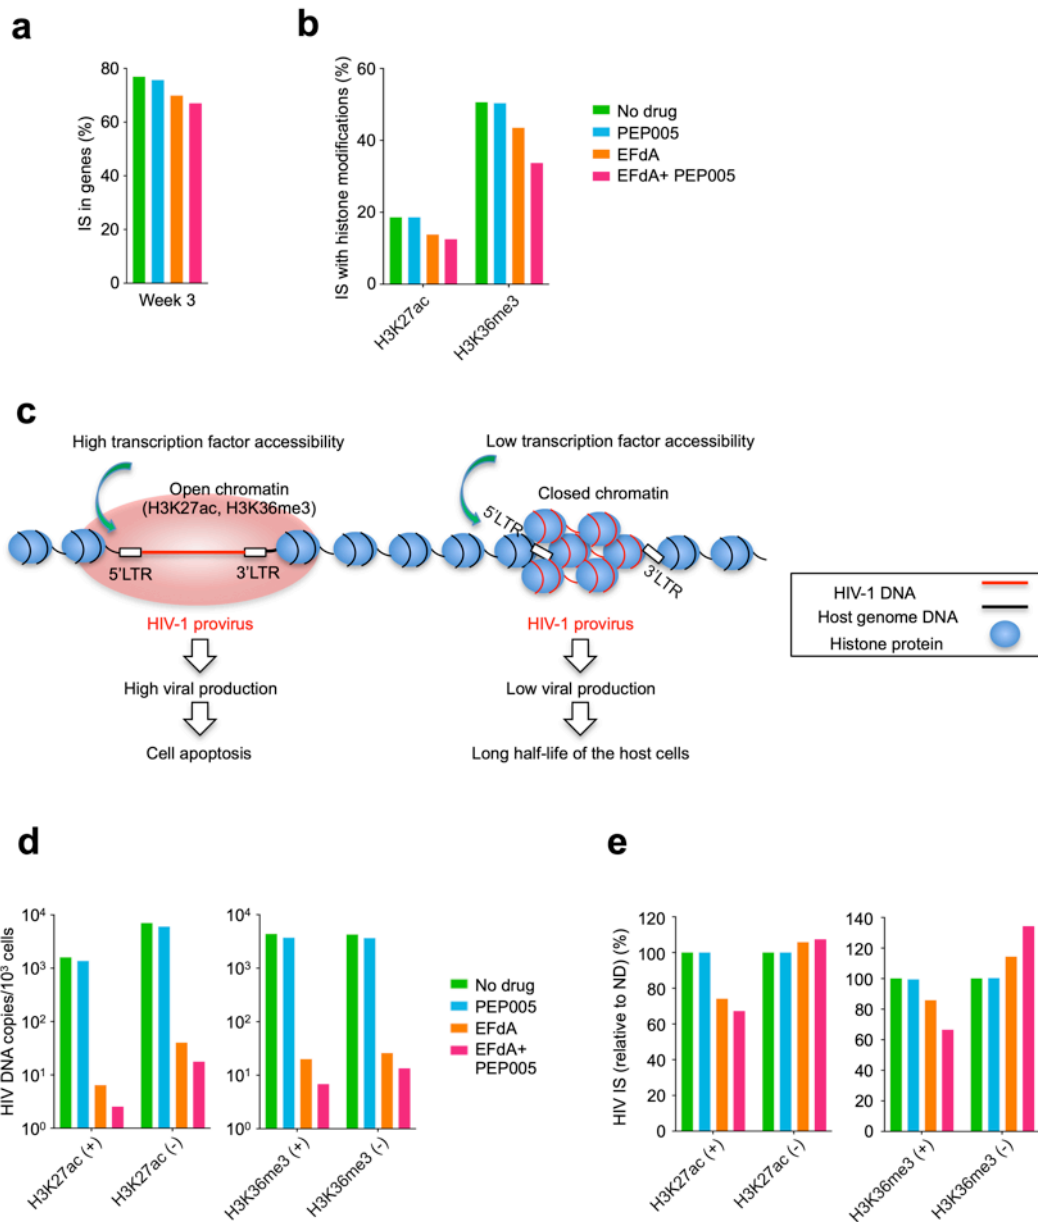

**Fig. 5 | Factors affecting drug susceptibility in the WIPE assay. a**, Percentages of HIV-1 proviruses integrated within the host genes. **b**, Percentages of HIV-1 ISs with histone modifications after 3 weeks of drug treatment. Histone modifications in primary helper memory T cells from peripheral blood were obtained from ChIP-Seq datasets from the ENCODE project<sup>49</sup>. **c**, Schematic figure showing different LRA susceptibility mediated by epigenetic status of the HIV-1 provirus. **d**, HIV DNA copies per 10<sup>3</sup> cells with or without the histone marks H3K27ac or H3K36me3 after 3 weeks of the initial drug treatment.

## **Extended Data Figures and Tables**

### **The WIPE assay for selection and elimination of HIV-1 provirus *in vitro* using latency-reversing agents**

*Matsuda et al.*

**a** Infectivity of the virus from Jurkat/NL cells

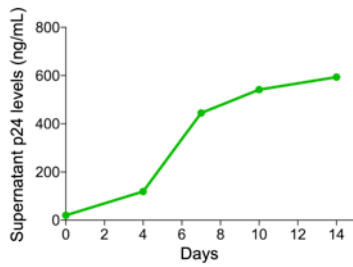

**b**

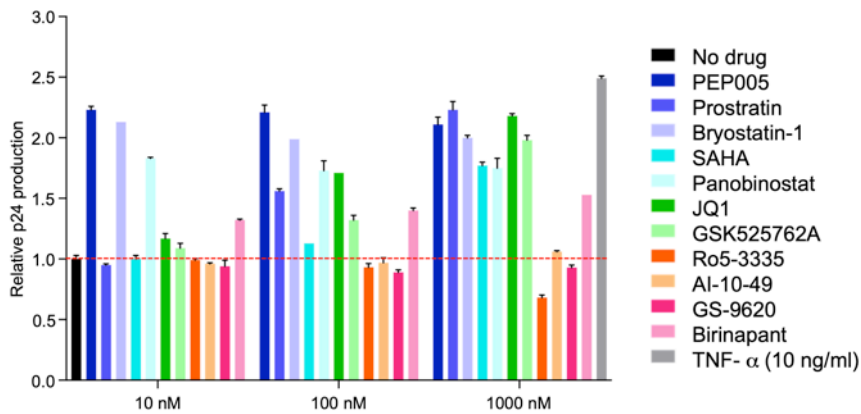

**c**

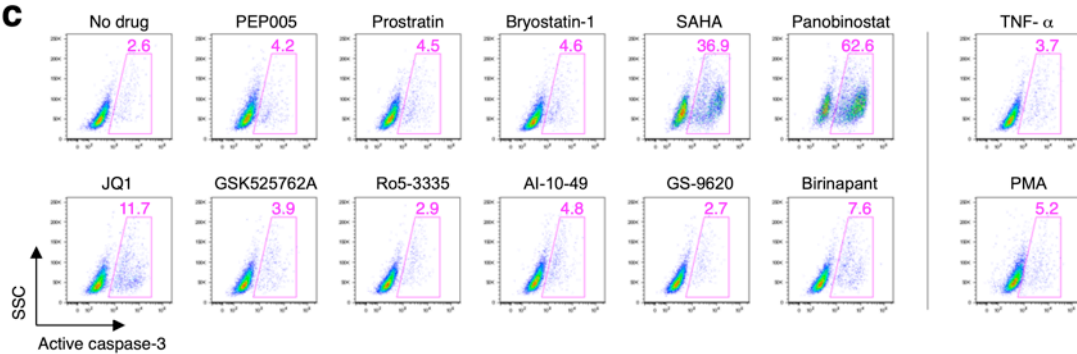

**Extended Data Fig. 1 | Viral infectivity in Jurkat/NL cells and effects of LRAs on HIV-1 production and cell apoptosis.** **a**, Infectivity of HIV-1<sub>NL4-3</sub> produced from Jurkat/NL cells. MT4 cells were infected with the virus, cultured, and then supernatant p24 levels were measured. **b–c**, Efficacy of LRAs in inducing HIV-1 production or caspase-3 activation in Jurkat/NL cells. Cells were treated with a drug (1 μM) for 24 h and the changes in supernatant p24 values (**b**) or percentage of active forms of caspase-3 expression (**c**) were examined.

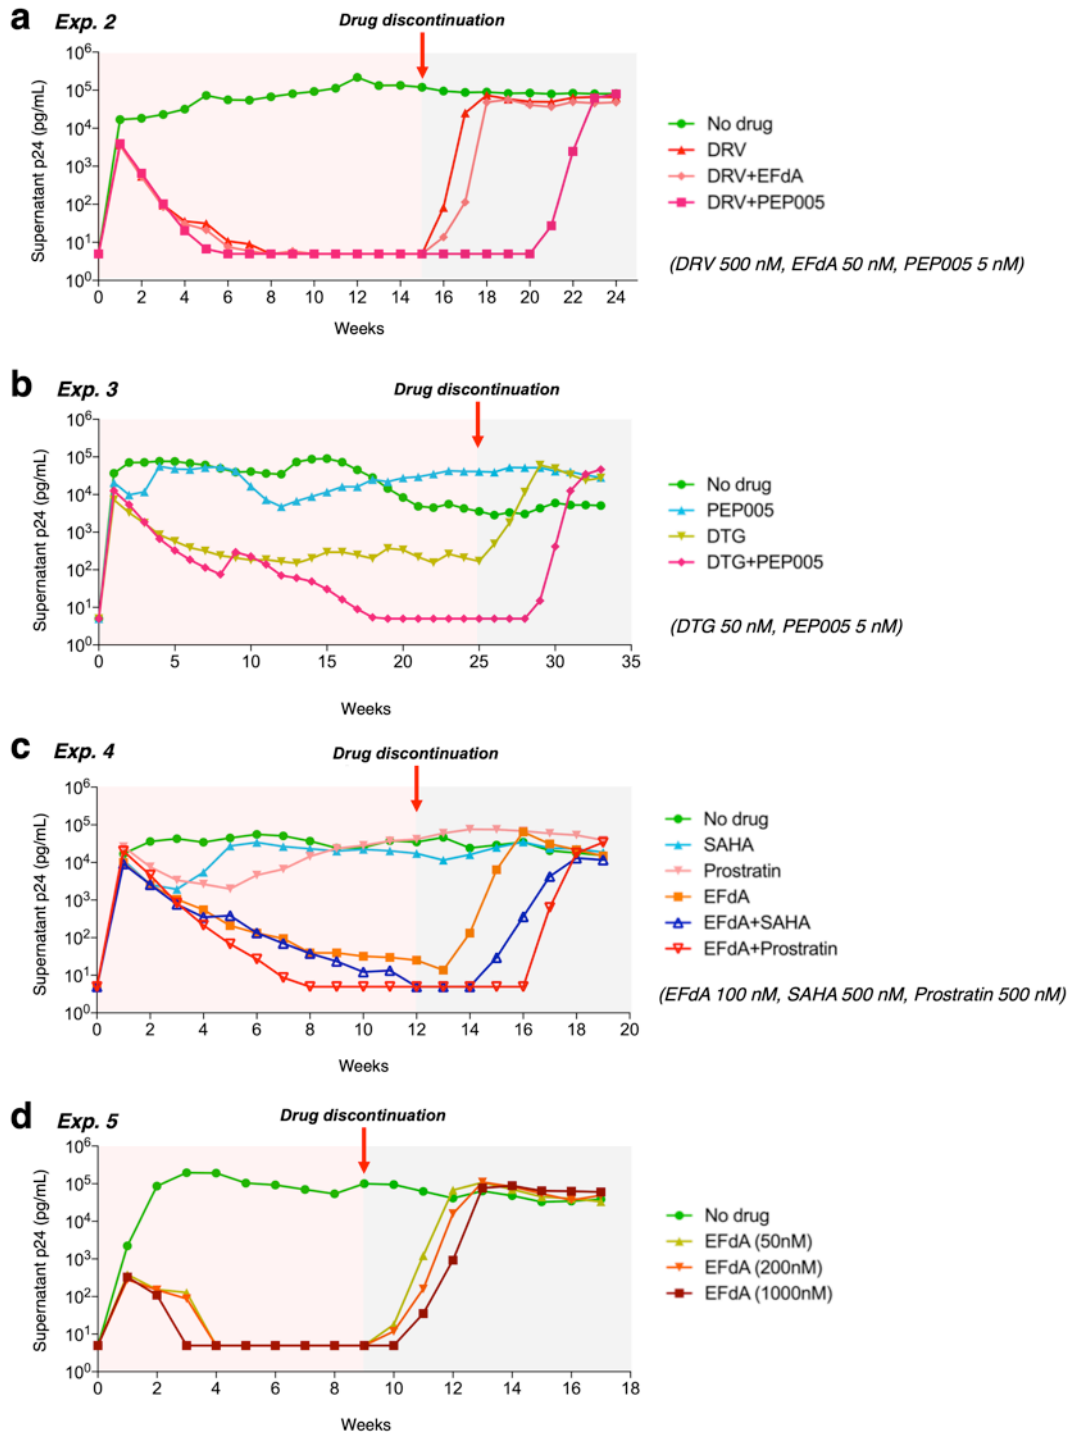

**Extended Data Fig. 2 | Effect of various combinations of antiretroviral drugs and LRAs on viral persistence.** Changes in HIV-1 production under treatment with 5 nM PEP005, 50 nM EFdA, and/or 500 nM Darunavir (DRV, protease inhibitor) (a), 5 nM PEP005, and/or 50 nM Dolutegravir (DTG, integrase inhibitor) (b), and 100 nM EFdA, 500 nM SAHA (HDAC inhibitor), and/or 500 nM prostratin (PKC activator) (c). d, EFdA at different concentrations (50 nM, 200 nM, and 1  $\mu$ M) was examined. A higher concentration of EFdA (200 nM and 1  $\mu$ M) slightly delayed the recurrence of supernatant viruses after treatment interruption.

**a** *Exp. 6*

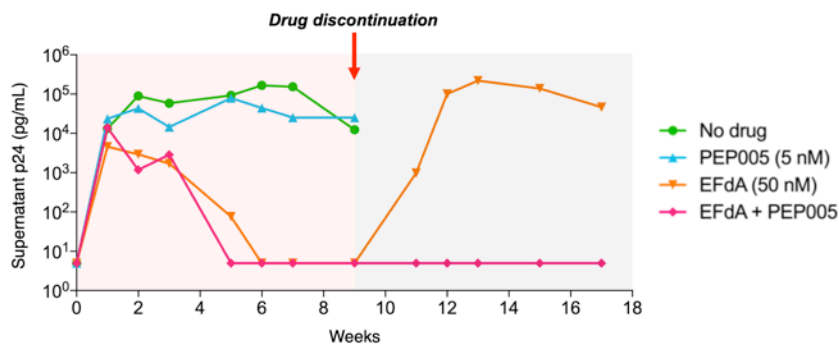

**b** Changes in HIV-mRNA with TNF- $\alpha$  stimulation

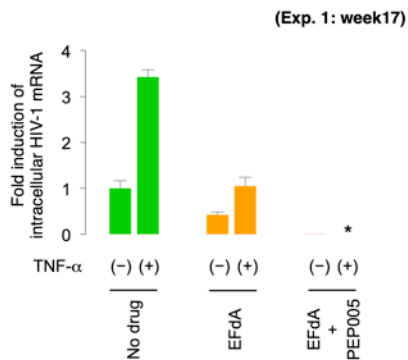

**c** *Exp. 1*

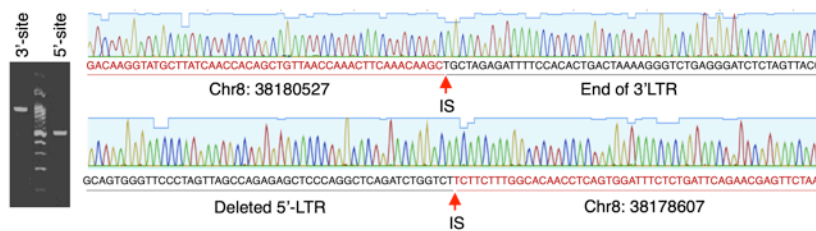

**Extended Data Fig. 3 | Underlying mechanisms of the experimental cure (Exp. 1 and 6).** **a**, Result of WIPE assay with EFdA and PEP005 in Exp. 6 (an experiment shown in **Fig. 2b**). **b**, Analysis of HIV-1 mRNA transcripts in cells of Exp. 1 (**Fig. 2d**) on week 17 with TNF- $\alpha$  stimulation. Cells were treated with 10 ng/mL TNF- $\alpha$  for 24 h, and the change in intracellular HIV-1-mRNA transcripts was analyzed. **c**, Result of IS-specific PCR of the expanded clone in Exp. 1 (**Fig. 3f**). PCR bands amplified from either 5'LTR- or 3'LTR-host junctions (502 bp and 773 bp, respectively) are shown on the left. DNA sequencing results of the host-virus junctions are shown on the right.

**a** ART (-)

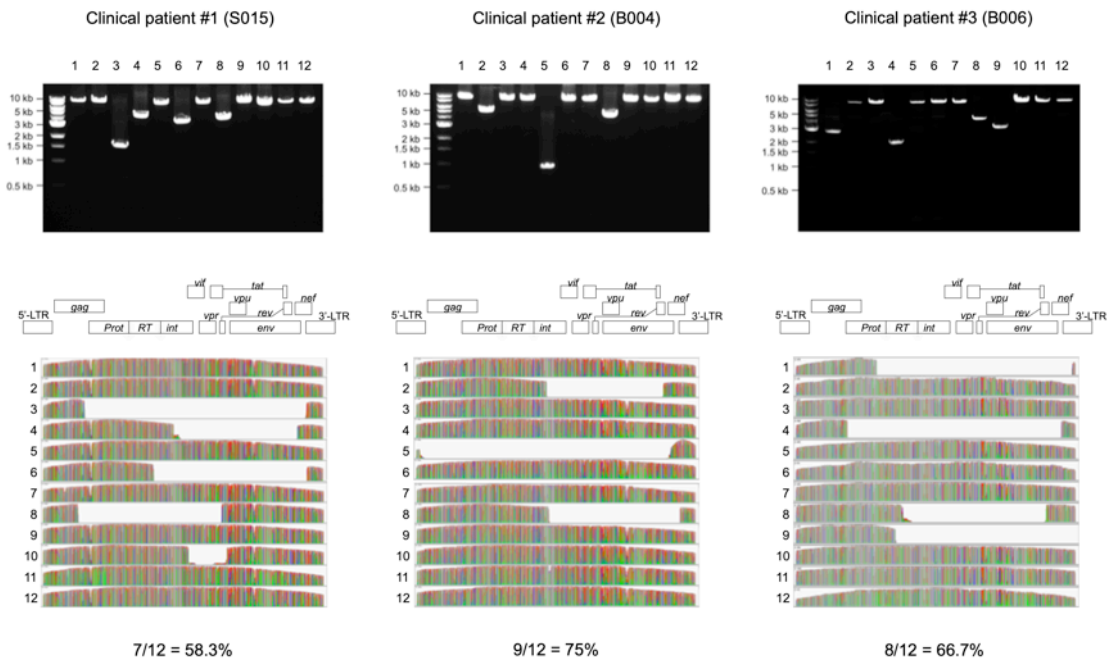

**b** ART (+)

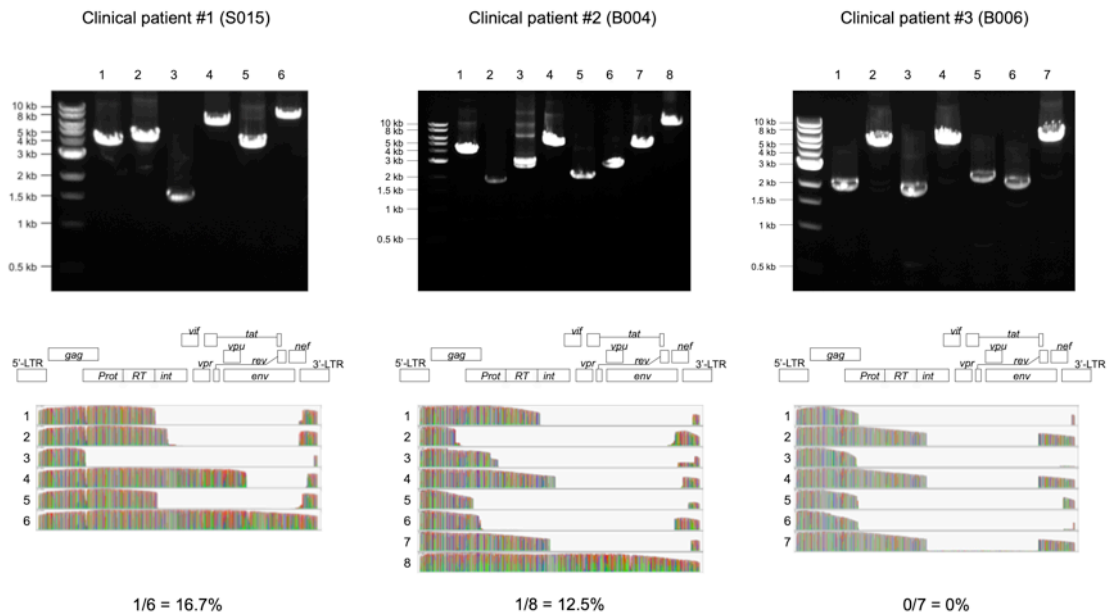

**Extended Data Fig. 4 | Nearly full-length, single-genome PCR analysis of the primary cells of HIV-1 infected patients. a**, PCR products of cells from three HIV-1 patients (**Extended Data Table 2**) before initiation of effective cART treatment. **b**, PCR products of cells from the same patients after cART treatment (duration, 84–264 months).

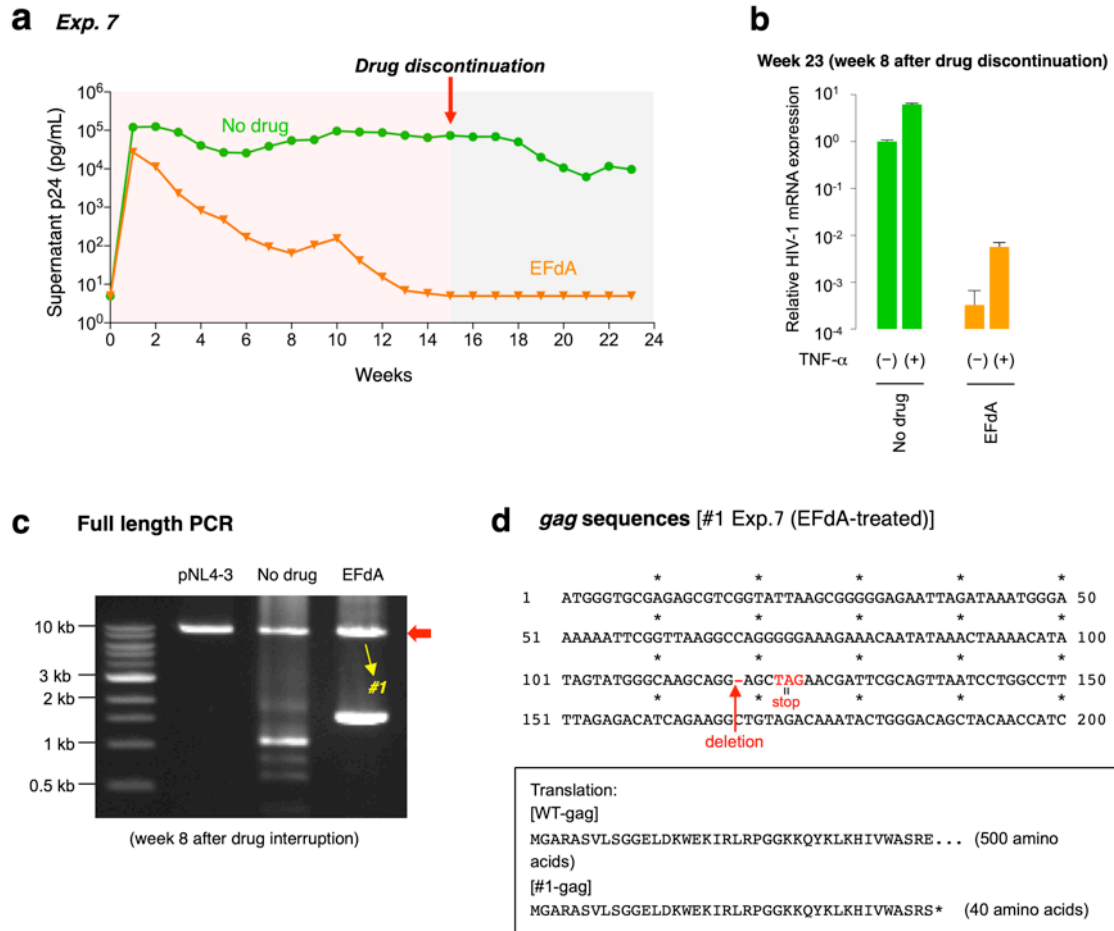

**Extended Data Fig. 5 | An underlying mechanism of an experimental cure (Exp. 7).** **a**, Treatment of Jurkat/NL cells with EFdA (Exp. 7). In this experiment, HIV-1 rebound was not observed in cells treated with EFdA until week 23; however, EFdA-treated cells showed an increase in HIV-1 mRNA expression with TNF- $\alpha$  stimulation (**b**), suggesting that the cells containing replication-competent proviruses are a minor population. **c**, PCR products (9031 bp) of cell samples from Exp. 7 on week 23. **d**, Sequencing analysis of PCR products (#1) in (**c**) with NGS demonstrated that there is a 1-bp deletion with a premature stop codon in HIV-1 *gag*.



### 1. Large deletion(s) in viral protein coding regions

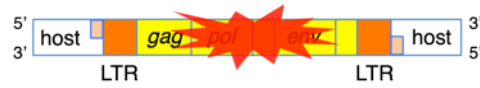

### 2. Critical mutation(s) in viral coding sequences

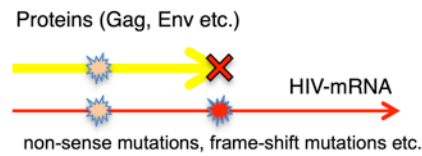

### 3. Abnormalities in proviral transcription

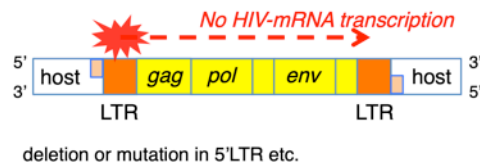

**Extended Data Fig. 6 | Mechanism of HIV-1 provirus replication incompetency observed after drug treatment.**

**Extended Data Table 1.** Characteristics of HIV-1-infected patients

| Patient ID | M/F | Age | VL <sup>a</sup><br>(copies/mL) | CD4 count <sup>a</sup><br>(cells/mm <sup>3</sup> ) | cART             | Therapy<br>(years) | Plasma HIV RNA <<br>20 copies/mL for<br>(years) |
|------------|-----|-----|--------------------------------|----------------------------------------------------|------------------|--------------------|-------------------------------------------------|
| B-004      | F   | 46  | <20                            | 447                                                | FTC/TAF/EFV      | 19                 | 7                                               |
| B-006      | M   | 56  | <20                            | 632                                                | FTC/TAF/RPV      | 22                 | 7                                               |
| S-015      | M   | 49  | <20                            | 509                                                | FTC/TAF/COBI/EVG | 7                  | 6                                               |

<sup>a</sup>VL and CD4 count were measured at the time of the study.

COBI, cobicistat; EFV, efavirenz; EVG, elvitegravir; FTC, emtricitabine; RPV, rilpivirine; TAF, tenofovir alafenamide fumarate; VL, viral load.

**Extended Data Table 2.** PCR primers used in the present study

[Quantitative PCR]

| Target                  | Primer name                    | Sequence (5'-3')                      | Reference |
|-------------------------|--------------------------------|---------------------------------------|-----------|
| HIV-1 LTR               | MH531<br>(forward)             | TGTGTGCCCGTCTGTTGTGT                  | 34        |
|                         | MH532<br>(reverse)             | GAGTCCTGCGTCGAGAGAGC                  | 34        |
|                         | LRTp (probe)                   | FAM-CAGTGGCGCCCGAACAGGGA-BHQ1         | 34        |
| $\beta$ 2-microglobulin | $\beta$ 2m_S<br>(forward)      | GGAATTGATTTGGGAGAGCATC                | 35        |
|                         | $\beta$ 2m_AS<br>(reverse)     | CAGGTCCTGGCTCTACAATTTACTAA            | 35        |
|                         | $\beta$ 2m_P (probe)           | FAM-AGTGTGACTGGGCAGATCATCCACCTTC-BHQ1 | 35        |
| HIV-1 gag               | gag_S<br>(forward)             | GGTGCAGAGCGTCGGTATTAAG                | 36        |
|                         | gag_AS<br>(reverse)            | AGCTCCCTGCTTGCCCATA                   | 36        |
| $\beta$ -actin          | $\beta$ -actin_S<br>(forward)  | GCGAGAAGATGACCCAGATC                  | 11        |
|                         | $\beta$ -actin_AS<br>(reverse) | CCAGTGGTACGGCCAGAGG                   | 11        |

[Near full-length single HIV-1 genome PCR]

| Primer set   | Name     | HXB2 position | Length (bp) | Sequence (5'-3')              | Reference |
|--------------|----------|---------------|-------------|-------------------------------|-----------|
| First round  | DNA F1   | 623–649       | 9064        | AAATCTCTAGCAGTGGCGCCCGAACAG-  | 27        |
|              | DNA R1   | 9652–9676     |             | TGAGGGATCTCTAGTTACCAGAGTC     | 27        |
| Second round | Nested F | 638–666       | 8985        | GCGCCCGAACAGGGACYTGAAARCGAAAG | 37        |
|              | DNA R2   | 9603–9632     |             | GCACTCAAGGCAAGCTTTATTGAGGCTTA | 27        |

|                      |           |           |      |                               |    |
|----------------------|-----------|-----------|------|-------------------------------|----|
| Second<br>(clinical) | DNA F2    | 682–705   | 8951 | TCTCTCGACGCAGGACTCGGCTTG      | 27 |
|                      | DNA<br>R2 | 9603–9632 |      | GCACTCAAGGCAAGCTTTATTGAGGCTTA | 27 |

[Linker-mediated PCR primers]

| Target              | Name         | Sequence (5'-3')                                                                                  | Reference |
|---------------------|--------------|---------------------------------------------------------------------------------------------------|-----------|
|                     | Long linker  | TCATATAATGGGACGATCACAAGCAGAAGACGGCATACG<br>AGATNNNNNNNN CGGTCTCGGCATTC<br>CTGCTGAACCGCTCTTCCGATCT | 23        |
|                     | Short linker | p-GA TCGGAAGAGCGAAAAAAAAAAAAA                                                                     | 23        |
| 1 <sup>st</sup> PCR | B3           | GCTTGCCTTGAGTGCTTCAAGTAGTGTG                                                                      | 23        |
|                     | B4           | TCATGATCAATGGGACGATCA                                                                             | 23        |
| 2 <sup>nd</sup> PCR | P5B5         | AATGATACGGCGACCACCGAGATCTACACGTGCCCGTCT<br>GTTGTGTGACTCTGG                                        | 23        |
|                     | P7           | CAAGCAGAAGACGGCATACGAGAT                                                                          | 23        |

[High- throughput sequencing primers]

| Target          | Name   | Sequence (5'-3')                      | Reference |
|-----------------|--------|---------------------------------------|-----------|
| HIV-1           | Read1  | ATCCCTCAGACCCTTTTAGTCAGTGTGGAAAATCTC  | 23        |
| Human genome    | Read2  | CGGTCTCGGCATTCCTGCTGAACCGCTCTTCCGATCT | 23        |
| Adaptor barcode | Index1 | GATCGGAAGAGCGGTTCAGCAGGAATGCCGAGACCG  | 23        |
